1 ***Genetic influences on the intrinsic and extrinsic functional organizations of the***  
2 ***cerebral cortex***

3

4 **Running title: GWAS of cerebral cortex functions**

5

6 Bingxin Zhao<sup>1</sup>, Tengfei Li<sup>2,3</sup>, Stephen M. Smith<sup>4</sup>, Di Xiong<sup>5</sup>, Yue Yang<sup>5</sup>, Xifeng Wang<sup>5</sup>,  
7 Tianyou Luo<sup>5</sup>, Ziliang Zhu<sup>5</sup>, Yue Shan<sup>5</sup>, Zhenyi Wu<sup>1</sup>, Zirui Fan<sup>1</sup>, Heping Zhang<sup>6</sup>, Yun Li<sup>5,7,8</sup>,  
8 Jason L. Stein<sup>7,9</sup>, and Hongtu Zhu<sup>3,5\*</sup>

9

10 <sup>1</sup>Department of Statistics, Purdue University, West Lafayette, IN 47907, USA.

11 <sup>2</sup>Department of Radiology, University of North Carolina at Chapel Hill, Chapel Hill, NC 27599, USA.

12 <sup>3</sup>Biomedical Research Imaging Center, School of Medicine, University of North Carolina at Chapel Hill,  
13 Chapel Hill, NC 27599, USA.

14 <sup>4</sup>Wellcome Centre for Integrative Neuroimaging, FMRIB, Nuffield Department of Clinical  
15 Neurosciences, University of Oxford, Oxford, UK.

16 <sup>5</sup>Department of Biostatistics, University of North Carolina at Chapel Hill, Chapel Hill, NC 27599, USA.

17 <sup>6</sup>Department of Biostatistics, Yale University, New Haven, CT 06511, USA.

18 <sup>7</sup>Department of Genetics, University of North Carolina at Chapel Hill, Chapel Hill, NC 27599, USA.

19 <sup>8</sup>Department of Computer Science, University of North Carolina at Chapel Hill, Chapel Hill, NC 27599,  
20 USA.

21 <sup>9</sup>UNC Neuroscience Center, University of North Carolina at Chapel Hill, Chapel Hill, NC 27599, USA.

22

23 ***\*Corresponding author:***

24 Hongtu Zhu

25 3105C McGavran-Greenberg Hall, 135 Dauer Drive, Chapel Hill, NC 27599.

26 E-mail address: [htzhu@email.unc.edu](mailto:htzhu@email.unc.edu) Phone: (919) 966-7250

27

28

29

30

31

1 **Abstract**

2 The human cerebral cortex plays a crucial role in brain functions. However, genetic  
3 influences on the human cortical functional organizations are not well understood. Using  
4 a parcellation-based approach with resting-state and task-evoked functional magnetic  
5 resonance imaging (fMRI) from 40,253 individuals, we identified 47 loci associated with  
6 functional areas and networks at rest, 15 of which also affected the functional  
7 connectivity during task performance. Heritability and locus-specific genetic effects  
8 patterns were observed across different brain functional areas and networks. Specific  
9 functional areas and networks were identified to share genetic influences with cognition,  
10 mental health, and major brain disorders (such as Alzheimer's disease and schizophrenia).  
11 For example, in both resting and task fMRI, the *APOE*  $\epsilon$ 4 locus strongly associated with  
12 Alzheimer's disease was particularly associated with the visual cortex in the secondary  
13 visual and default mode networks. In summary, by analyzing biobank-scale fMRI data in  
14 high-resolution brain parcellation, this study substantially advances our understanding of  
15 the genetic determinants of cerebral cortex functions, and the genetic links between  
16 brain functions and complex brain traits and disorders.

17

18 **Keywords:** Brain disorders; Brain function; fMRI; GWAS; Mental health; UK Biobank.

19

20

21

22

23

24

25

26

27

28

29

30

1 The human cerebral cortex is the largest part of the human brain and controls complex  
2 brain functions. Based on known functional and topographic specializations at different  
3 scales, the cerebral cortex of the human brain can be divided into distinct areas and  
4 networks, providing insight into the brain's functional architecture<sup>1,2</sup>. To define such brain  
5 partitions, a few brain parcellations<sup>1,3-8</sup> have been developed over the past decade<sup>9</sup>. In  
6 functional magnetic resonance imaging<sup>10,11</sup> (fMRI), cerebral cortex functions can be  
7 evaluated by measuring functional connectivity, correlation of blood-oxygen-level  
8 dependent (BOLD) activity, among multiple cortical areas along a given parcellation. In  
9 particular, resting-state fMRI captures the intrinsic functional organization of the cortex  
10 without any explicit stimuli, whereas task-evoked fMRI measures extrinsic cortical  
11 interaction and temporal synchrony in response to a specific task<sup>12,13</sup>. A variety of clinical  
12 applications of both task-evoked and resting-state fMRI have revealed changes in brain  
13 function in multiple neurological and psychiatric disorders<sup>14-16</sup>, such as schizophrenia<sup>17,18</sup>,  
14 Alzheimer's disease<sup>19</sup>, Parkinson's disease<sup>20</sup>, autism spectrum disorders<sup>21</sup>, and major  
15 depressive disorder (MDD)<sup>22</sup>.

16

17 Twin studies have established that brain functional organizations characterized by resting  
18 and task fMRI are moderately heritable<sup>23-30</sup> (heritability range was (0.2,0.6) in a recent  
19 review<sup>31</sup>). The narrow sense single-nucleotide polymorphism (SNP) heritability of resting  
20 fMRI traits was reported to be around 10% across the entire brain and higher than 30%  
21 in some functional regions<sup>32</sup>. The heritability of brain functional traits was typically lower  
22 than that of brain structural traits<sup>32-35</sup>. Nevertheless, brain functional traits could more  
23 directly connect genetic variations to mechanisms underlying behavioral differences<sup>36</sup>. A  
24 few genome-wide association study (GWAS)<sup>32,34,37</sup> have been recently conducted on  
25 resting fMRI traits using a whole brain spatial independent component analysis (ICA)<sup>38-40</sup>  
26 approach. The whole brain ICA is a parcellation-free dimension reduction method that  
27 estimates the functional brain regions (i.e., ICA components/regions) directly from the  
28 fMRI data. Although ICA is a powerful and popular fMRI tool, it is a data-driven method,  
29 which might limit its generalizability and interpretability<sup>12</sup>. For example, the ICA  
30 components estimated from training data may form a sample-dependent functional  
31 network and it is not clear if they can be generalized to independent datasets. Moreover,  
32 it might be difficult to use ICA to compare intrinsic and extrinsic functional architectures,

1 since the ICA components estimated in resting and task fMRI may not be well-aligned.  
2 Additionally, ICA attempts to capture major variations in the data. As a result, ICA regions  
3 typically have large sizes, limiting their ability to capture high-resolution details of brain  
4 functionality. For example, an earlier study<sup>40</sup> defined 55 ICA components in the UK  
5 Biobank<sup>41</sup> (UKB) dataset, most of which are distributed across multiple areas and  
6 networks<sup>37</sup>.

7

8 In this paper, we used a parcellation-based approach to provide fine-grained details about  
9 the genetic architecture of cerebral cortex functional organizations. A recently developed  
10 human brain parcellation<sup>1</sup>, which partitioned the cerebral cortex into 360 areas (referred  
11 to as the Glasser360 atlas hereafter, **Table S1**), was used to analyze resting and task fMRI  
12 data of 40,253 individuals in the UKB study. The task implemented in the UKB study was  
13 an emotional processing task<sup>42,43</sup>, known to robustly activate amygdala and visual  
14 systems. The Glasser360 atlas was constructed using high-quality multi-modality data  
15 from the Human Connectome Project (HCP<sup>44</sup>) and greatly improved the neuroanatomical  
16 resolution of human cerebral cortex annotations. The 360 cortical areas were grouped  
17 into 12 functional networks<sup>45</sup>, including four well-known sensory networks (the primary  
18 visual, secondary visual, auditory, and somatomotor), four cognitive networks (the  
19 cingulo-opercular, default mode, dorsal attention, and frontoparietal), the language  
20 network, and three recently identified networks (the posterior multimodal, ventral  
21 multimodal, and orbito-affective) (**Figs. 1A-B, Fig. S1A**). In addition to pairwise functional  
22 connectivity among areas, we developed a parcellation-based dimension reduction  
23 procedure to generate network level fMRI traits via a combined principal component  
24 analysis (PCA) and ICA methods<sup>32</sup> in a training-validation design (**Fig. S1B, Methods**). The  
25 area level functional connectivity pairs within each network and between each pair of  
26 networks were aggregated into network level traits. Genetic architectures were examined  
27 at both area and network levels for brain functions using these functional connectivity  
28 traits. Together, there were 8,531 area level traits and 1,066 network level traits for  
29 resting fMRI and 8,531 area level traits and 919 network level traits for task fMRI.  
30 Compared to the whole brain ICA-based GWAS<sup>32,34,37</sup> in the prior literature for resting  
31 fMRI, the current parcellation-based study 1) enabled the comparison between intrinsic  
32 and extrinsic functional architectures using both resting and task fMRI; and 2) uncovered



1 much more and finer detail on the genetic influences on specific functional areas and  
2 networks and their genetic links with brain traits and disorders.

## 3 4 **RESULTS**

### 5 **Consistency and reproducibility of the cerebral cortex functional organizations**

6 In this section, we examined the consistency and reproducibility of functional connectivity  
7 using annotations defined in the Glasser360 atlas in the UKB study. As in Glasser, et al. <sup>1</sup>,  
8 we first compared the group means of two independent sets of UKB subjects: the UKB  
9 phases 1 and 2 data (imaging data released up through 2018<sup>46</sup>,  $n = 17,374$ ) and the UKB  
10 phase 3 data (data released in early 2020,  $n = 16,852$ , removing the relatives of subjects  
11 in early released data). **Figures S2-S3** illustrate the consistent spatial patterns of  
12 functional connectivity across the two independent groups. The group mean maps were  
13 highly similar, with the correlation across the 64,620 ( $360 \times 359/2$ ) functional connectivity  
14 being 0.996 in resting fMRI and 0.994 in task fMRI. These results may suggest that the  
15 HCP-trained Glasser360 atlas can provide a set of well-defined and biologically  
16 meaningful brain functional traits that are generalizable across datasets.

17  
18 Furthermore, we evaluated the reproducibility of the Glasser360 atlas using the repeat  
19 scans from the UKB repeat imaging visit ( $n = 2,771$ , average time between visits = 2 years).  
20 We performed two analyses. The first analysis is to compare the group mean maps of the  
21 original imaging visit to those of the repeat visit. Functional connectivity maps were highly  
22 consistent between the two visits, with correlation of 0.997 and 0.994 for resting and task  
23 fMRIs, respectively (**Figs. S4-S5**). The second analysis quantified individual-level  
24 differences between the two visits. Specifically, we evaluated the reproducibility of each  
25 functional connectivity by calculating the correlation between two observations from all  
26 revisited individuals. Overall, the average reproducibility was 0.37 (standard error = 0.11)  
27 for resting fMRI and 0.30 (standard error = 0.08) for task fMRI (**Figs. S6A-B**). A few patterns  
28 were observed. For example, the reproducibility of within-network connectivity was high  
29 in resting fMRI but decreased in task fMRI (**Fig. 1C**, mean = 0.46 vs. 0.32,  $P < 2.2 \times 10^{-16}$ ).  
30 During task fMRI, the connectivity within activated functional areas (defined by group-  
31 level Z-statistic maps, **Supplementary Note**) showed higher reproducibility than that  
32 within nonactivated areas (**Fig. 1D, Fig. S7A**, mean = 0.40 vs. 0.30,  $P < 2.2 \times 10^{-16}$ ). The

1 majority of activated areas were in the secondary visual, dorsal attention, and  
2 somatomotor networks (**Fig. S8**). Additionally, we found that connectivity with low  
3 reproducibility (e.g.,  $< 0.25$ ) typically had low connectivity strength as well, suggesting  
4 that weak connectivity might be noisier than medium or strong connectivity (**Figs. S6C-**  
5 **D**). We also evaluated the reproducibility of our network level traits. The mean  
6 reproducibility was 0.43 (standard error = 0.08) for resting fMRI and 0.40 (standard error  
7 = 0.08) for task fMRI. These results indicate that network level traits are more  
8 reproducible, likely due to the reduction of noise that occurred during our dimension  
9 reduction procedure.

10  
11 Finally, we compared the spatial patterns of UKB and HCP studies. The correlation  
12 between UKB and HCP was 0.90 for resting fMRI and 0.78 for task fMRI in the group mean  
13 analysis (**Fig. S9**). These results demonstrate a substantial level of overall consistency  
14 between the typical subjects in a healthy young adult cohort and those of middle age and  
15 older age. Next, we examined the reproducibility of the Glasser360 atlas using the  
16 repeated scans in HCP study ( $n = 1075$ , average time between two scans = 1 day). The  
17 average reproducibility was 0.40 (standard error = 0.09) for resting fMRI and 0.22  
18 (standard error = 0.11) for task fMRI (the emotion task) (**Fig. S7B**). These results show that  
19 the two studies have similar reproducibility, suggesting that the quality of fMRI traits in  
20 the biobank-scale UKB study is comparable to that of the HCP project when using the  
21 Glasser360 atlas. Similar to the UKB study, the activated connectivity of HCP task fMRI  
22 had higher reproducibility than the nonactivated connectivity (**Fig. S7C**, mean = 0.382 vs.  
23 0.225,  $P < 2.2 \times 10^{-16}$ ). In general, the excellent group mean map consistency, as well as  
24 the similar reproducibility between the UKB and the HCP studies, provide confidence that  
25 the Glasser360 atlas will be able to consistently annotate the functional organization of  
26 typical subjects in a healthy population.

### 27 28 **Heritability of human cerebral cortex functional connectivity at rest and during a task.**

29 We next examined the heritability pattern of functional connectivity across different  
30 functional areas and networks. Using UKB individuals of white British ancestry ( $n = 34,641$   
31 for resting and 32,144 for task), SNP heritability was estimated via GCTA<sup>47</sup> for the 8,531  
32 area level within-network functional connectivity traits in both resting and task fMRI. The

1 mean heritability ( $h^2$ ) was 10.4% for resting and 6.6% for task fMRI. Overall, the SNP  
2 heritability of 97.9% (8,349/8,531) resting functional connectivity and 80.8%  
3 (6,894/8,531) task functional connectivity traits remained significant after adjusting for  
4 multiple comparisons using the Benjamini-Hochberg procedure to control the false  
5 discovery rate (FDR) at 0.05 level (**Table S2**). We also estimated the heritability of the  
6 1,985 network level traits (1,066 for resting and 919 for task). The mean  $h^2$  was 32.2% for  
7 amplitude and 12% for functional connectivity in resting fMRI; and that was 19.6% for  
8 amplitude and 10.4% for functional connectivity in task fMRI (**Table S3**). Consistent with  
9 the results above on reproducibility, the higher heritability of network level fMRI traits  
10 may suggest that our dimension reduction approach reduces noise by aggregating fMRI  
11 signals or that genetics have a stronger influence on broader brain networks rather than  
12 specific region pairs.

13

14 **Figure 2A** and **Figure S10A** illustrate the heritability pattern across different networks.  
15 The mean heritability was highest in the ventral multimodal network during resting fMRI  
16 (mean = 20.4%). The ventral multimodal is a recently identified network<sup>45</sup>, consisting of  
17 four cortical areas (left/right TF and PeEc, **Fig. S1A**) on the ventral surface of the temporal  
18 lobe<sup>45</sup>. One possible function of this network is to represent higher-order semantic  
19 categories<sup>45</sup>. In addition, the mean heritability of task fMRI was lower than that of resting  
20 fMRI in all networks except for the secondary visual network, where more than half  
21 (52.32%) of connectivity had greater heritability during task fMRI (**Fig. S10B**). This might  
22 be partly because the secondary visual network is highly activated, which follows our  
23 results on reproducibility.

24

25 In each network, the heritability pattern across functional areas was identified. For  
26 example, according to physical locations, the areas of the default mode network can be  
27 divided into seven clusters (**Fig. S11**). There is no significant correlation between the  
28 physical distance of these default mode area pairs and their heritability measurements ( $P$   
29 = 0.563). In the visual cluster (including the precuneus, calcarine, and cingulate) and the  
30 temporal cluster, the default mode connectivity was most heritable. Additionally, the  
31 connectivity between the two clusters and the angular and frontal clusters showed high  
32 heritability, indicating the high degree of genetic control of functional interaction among

1 these physically disconnected regions (**Fig. 2B**). In the somatomotor network, the  
2 left/right 3a, 3b, and 4 areas (in the postcentral, precentral, and paracentral) and the  
3 left/right 7AL and 7PC areas (in the superior parietal) form two separate connectivity  
4 clusters. We found that the 3a, 3b, and 4 areas had the highest heritability within the  
5 somatomotor network, while the heritability of the 7AL and 7PC areas was low. In  
6 addition, the connectivity associated with the left OP2-3 area (in the Rolandic operculum  
7 and insula) had high heritability (**Fig. S12**). In the cingulo-opercular network, the insula-  
8 related areas (e.g., the left/right FOP5, Pol1, FOP3, FOP1, FOP4, MI, and Pol2) exhibited  
9 the highest heritability. However, the heritability of the adjacent para-insular area (the  
10 left/right PI, in the temporal pole and superior temporal) was low (**Fig. S13**). The insula is  
11 a functionally diverse part of the cortex involved in multiple functions, including emotion,  
12 cognition, and sensory perception<sup>48,49</sup>. The insula has been found to have the highest  
13 heritability in surface curvature analysis of cortical morphometry<sup>29</sup>. Additionally, the  
14 connectivity of a few areas showed consistently high heritability in resting fMRI, including  
15 the left/right IPS1 areas (in the superior occipital) of the secondary visual network and  
16 the right TE1m and left/right TE1p areas (in the inferior temporal and middle temporal)  
17 of the frontoparietal network (**Fig. S14**). In task fMRI, we also observed a few areas that  
18 had higher heritability than others, including the visual cluster, left OFC (orbitofrontal  
19 complex), and left/right 25 areas (in the olfactory cortex) of the default mode network  
20 (**Fig. S15**); the left/right RSC (in the middle cingulate), POS2 (in the precuneus and  
21 cuneus), 7Pm (in the precuneus) areas of the frontoparietal network (**Fig. S16**); and the  
22 middle cingulate-related areas (e.g., the left/right p24pr, a24pr, and left 33pr) of the  
23 cingulo-opercular network (**Fig. S17**). In summary, our results illustrate the variations of  
24 genetic influences in the cerebral cortex and underscore the important functional areas  
25 whose interactions are strongly influenced by genetic factors.

26

27 We also explored the relationship between heritability and reproducibility and activation  
28 maps. For all 12 networks, both resting and task fMRI showed strong positive correlations  
29 between heritability and reproducibility (overall correlation = 0.47 for resting and 0.40 for  
30 task,  $P < 2.2 \times 10^{-16}$ , **Fig. S18**). These results may suggest that functional interactions that  
31 are more reproducible tend to be more genetically controlled. The heritability pattern  
32 was also correlated with the activation maps. In resting fMRI, the heritability of task-

1 defined activated connectivity was lower than that of nonactivated connectivity (**Fig. 2C**,  
2 mean = 8.9% vs. 10.8%,  $P < 2.2 \times 10^{-16}$ ). However, in task fMRI, activated connectivity had  
3 a higher heritability than nonactivated connectivity (mean = 7.4% vs. 6.3%,  $P < 2.2 \times 10^{-16}$ ).  
4 These differences can be partially explained by the observation that the activated  
5 connectivity had greater reproducibility than the nonactivated connectivity in task fMRI,  
6 and may also due to the task-related changes in brain functions and inter-regional  
7 connectivity<sup>50</sup>. Some genetic effects may only be detected when activating a particular  
8 brain region, which is like a gene-environment interaction and implies that we would need  
9 broad numbers of tasks to be able to detect more genetic influences on some specific  
10 brain functions. Our findings are also related to previous observations that the correlation  
11 between two activated regions increases during task performance, whereas the  
12 correlation between other regions is decreased<sup>51</sup>. Overall, these results provide insights  
13 into the genetic influences on the intrinsic and extrinsic functional architecture and link  
14 the genetic variation patterns to reproducibility and activation maps.

15

#### 16 **Genetic loci associated with cerebral cortex functional areas and networks**

17 GWAS was performed for the  $8,531 \times 2$  within-network connectivity traits in resting and  
18 task fMRI using UKB individuals of white British ancestry (Methods). The LDSC intercepts<sup>52</sup>  
19 were close to one, suggesting no genomic inflation of test statistics due to confounding  
20 factors (mean intercept = 1.003, standard error = 0.010). At a stringent significance level  
21  $2.93 \times 10^{-12}$  ( $5 \times 10^{-8}/8,531/2$ , additionally adjusted for the number of traits studied), we  
22 identified 32 genomic regions (cytogenetic bands) associated with resting connectivity, 9  
23 of which were also associated with task connectivity (**Fig. 3A and Table S4**).

24

25 Enrichment of locus-specific genetic effects was observed across different areas and  
26 networks in resting fMRI. Many of the fMRI-associated genetic variants are known to  
27 affect gene expressions in previously published human brain expression quantitative trait  
28 loci (eQTL) datasets<sup>53,54</sup>. For example, most of the associations of the 2q14.1 locus were  
29 in the somatomotor network. The 2q14.1 locus was also particularly associated with the  
30 right MST and right V6 areas (in the middle temporal and cuneus) of the secondary visual  
31 network and a few areas (e.g., the left/right 43 in the Rolandic operculum and the p24pr  
32 in the middle cingulate) of the cingulo-opercular network (**Fig. S19**). **Figure S20** illustrates

1 the genes presented at this locus and shows that the index variant (and its proxy variants,  
2 linkage disequilibrium [LD]  $r^2 > 0.8$ ) are associated with the expression of *PAX8* and  
3 *FOXD4L1* in brain tissues<sup>53</sup>, suggesting that the two genes are relevant to neuronal  
4 function. The 10q23.33 and 10q26.3 loci were mainly associated with the cingulo-  
5 opercular, somatomotor, auditory, and default mode networks (**Figs. S21-S22**). The index  
6 variants were eQTLs of *NOC3L*, *PLCE1*, and *INPP5A* (**Fig. S23**). Moreover, most of the  
7 10q26.3-associated areas of the default mode network were in the hippocampal cluster  
8 (**Fig. S24**). The 3p11.1 locus had genetic effects on a few specific areas, including right PSL  
9 (Perisylvian language area, in the superior temporal) and left PF (in the supramarginal)  
10 areas of the cingulo-opercular network and the left PGs (in the angular) and the left 31a  
11 areas (in the middle cingulate) of the default mode network (**Fig. 3B** and **Figs. S25-S26**).  
12 The 11q22.1 locus was associated with the auditory network (especially the left MBelt  
13 [medial belt complex] area) and the insula-related areas (e.g., the left/right PoI1, PoI2,  
14 FOP3, MI, FOP4) of the cingulo-opercular network (**Fig. S27**). The significant variants were  
15 eQTLs of *CFAP300* (**Fig. S28**). The 15q14 locus was mainly associated with areas of the  
16 somatomotor and cingulo-opercular networks, such as the left FOP2 (in the Rolandic  
17 operculum) and the left 6r (in the opercular part of the inferior frontal) (**Figs. S29-S30**).  
18 Interesting, all associations at the 19q13.32 locus, which was the major risk factor of  
19 Alzheimer's disease, were in the secondary visual network (such as the left LO1 and right  
20 V3CD in middle occipital, left/right V3A in superior occipital, and left/right V6 in cuneus),  
21 with one exception in the visual cluster of the default mode network (**Fig. 3C** and **Figs.**  
22 **S31-S32**). These results highlight the close relationship between the 19q13.32 locus and  
23 the visual cortex. Similarly, the variants in 10q26.13 locus was particularly associated with  
24 the visual cluster of the default mode network and were eQTLs of *LHPP* and *EEF1AKMT2*  
25 (**Figs. S33-S34**). The 17p11.2 locus was mainly associated with the insula-related areas  
26 (e.g., the left/right MI and FPO4) and the middle cingulate-related areas (e.g., the  
27 left/right a24pr and p32pr) of the cingulo-opercular network (**Fig. S35**). The significant  
28 variants were eQTLs of *GRAPL* (**Fig. S36**). The variants in 3q24 locus were related to the  
29 cingulo-opercular and frontoparietal networks and were eQTLs of *ZIC4* (**Figs. S37-S38**).  
30 Additionally, we found that the 4q24 locus was mainly associated the left 6ma area (in  
31 the superior frontal) of the cingulo-opercular network, the 14q23.1 locus with the left

1 IPS1 area (in the superior occipital) of the secondary visual network, and the 2p21 locus  
2 with the left i6-8 area (in the middle frontal) of the frontoparietal network (**Figs. S39-S44**).  
3  
4 Among the 9 significant genomic regions identified in task fMRI, the 10q23.33 locus was  
5 mainly associated with the visual cluster of the default mode network (**Figs. S45-S46**),  
6 especially the left/right 31pv areas (in the middle cingulate) (**Fig. S47**). For other loci (e.g.,  
7 10q26.3, 3p11.1, and 19q13.32), the associated networks were similar to those in resting  
8 fMRI, although the number of connectivity traits surviving the stringent significance level  
9 became much smaller. We examined the pair-wise genetic correlations between the  
10 8,531 connectivity in resting and task fMRI via the cross-trait LD score regression<sup>55</sup>  
11 (Methods). The average genetic correlation among all of the 8,531 pairs was 0.554, 3,598  
12 of which were significant at the FDR 5% level (**Fig. S48**, mean = 0.710, standard error =  
13 0.192). The genetic correlations were strongly associated with the corresponding  
14 phenotypic correlations (correlation = 0.340,  $P < 2.2 \times 10^{-16}$ ), and were also related to the  
15 reproducibility of fMRI (correlation = 0.168,  $P < 2.2 \times 10^{-16}$ ). Although it was more difficult  
16 to identify associated loci for task fMRI, these strong genetic correlations suggest the  
17 overall similarity of the genetic architecture on brain functions at rest and during a task.  
18  
19 Next, we performed GWAS for the 1,985 network level traits to identify variants  
20 associated with connectivity within each of the 12 network and between each pair of  
21 networks. At the  $2.51 \times 10^{-11}$  ( $5 \times 10^{-8}/1,985$ ) significance level, we identified 41 (15  
22 additional) genomic regions for resting fMRI, 14 of which were also associated with task  
23 fMRI (**Table S5**). On average, these 41 genetic regions explained 13.5% of the heritability  
24 of network level fMRI traits. Together, the area and network level analysis identified 47  
25 genomic regions for resting fMRI, 15 of which were also associated with task fMRI (**Fig.**  
26 **3A**). A recent whole brain ICA-based fMRI study<sup>34</sup> identified 21 genomic regions using  
27 1,777 resting fMRI traits ( $P < 2.81 \times 10^{-11}$ ,  $5 \times 10^{-8}/1,777$ ), 16 of which were also identified  
28 in our study. These results may suggest the higher power of our parcellation-based  
29 approach. Of the 47 loci, 19 had been linked to brain structural connectivity in a recent  
30 study of white matter microstructure using diffusion MRI (dMRI)<sup>46</sup> (**Table S6**). A few of  
31 the 19 overlapped loci had wide genetic effects on multiple white matter tracts and  
32 functional networks, such as the 16q24.2, 3p11.1, 16q24.2, and 15q14 (**Fig. S49**).

1  
2 Finally, we aimed to replicate the identified genomic loci using independent European  
3 and non-European datasets. First, we repeated GWAS on a European dataset with 4,882  
4 subjects, including European individuals in the UKB phase 4 data (early 2021 release,  
5 removed the relatives of our discovery sample) and individuals of white but non-British  
6 ancestry in UKB phases 1 to 3 data. For the 266 independent ( $LD\ r^2 < 0.1$ ) network-locus  
7 associations in resting fMRI, 60 (22.6%) passed the Bonferroni significance level ( $1.9 \times 10^{-4}$ ,  
8  $0.05/266$ ) in this validation GWAS, and 190 (71.4%) were significant at nominal  
9 significance level (0.05). All of the 190 significant associations had concordant directions  
10 in the two GWAS (**Fig. S50A**). Of the 47 identified genomic loci, at least one association of  
11 13 loci (27.7%) passed the Bonferroni significance level and 37 (78.7%) can be validated  
12 at 0.05 nominal significance level. For task fMRI, 33% (i.e., 19/57) network-locus  
13 associations passed the nominal significance level, all of which had the same effect signs  
14 in the two GWAS (**Fig. S50B**). The 17 associations were related to nine genomic loci, four  
15 (the 10q23.33, 16q24.2, 10q26.3, and 19q13.32) of which were significant at the  
16 Bonferroni significance level. Next, we performed GWAS on two UKB non-European  
17 validation datasets: the UKB Asian (UKBA,  $n = 469$ ) and UKB Black (UKBBL,  $n = 261$ ). Of the  
18 47 genomic loci, 16 (3 also in task) were validated in UKBA and 10 (5 also in task) were  
19 significant in UKBBL at nominal significance level, none of them survived the Bonferroni  
20 significance level (**Tables S4-S5**). Particularly, the 15q14 locus can be consistently  
21 validated for both resting and task fMRI in UKBA and UKBBL ( $P < 5.0 \times 10^{-3}$ ).

22

### 23 **The shared genetic influences with complex brain traits and disorders.**

24 To evaluate the shared genetic influences between brain functional organizations and  
25 complex brain traits and diseases, we carried out association lookups for independent ( $LD$   
26  $r^2 < 0.1$ ) significant variants (and variants in LD,  $r^2 \geq 0.6$ ) detected in UKB white British  
27 GWAS. In the NHGRI-EBI GWAS catalog<sup>56</sup>, our results tagged variants reported for a wide  
28 range of complex traits and diseases, such as neurological disorders, neuropsychiatric  
29 disorders, mental health and psychological traits, migraine, cognitive traits, educational  
30 attainment, sleep, smoking/drinking, and anthropometric measurements (**Table S7**). To  
31 explore the detailed colocalization pattern across brain functional regions, we took the  
32 index variants of colocalized traits/diseases and performed variant-specific association



1 analysis for all of the 64,620 functional connectivity (Methods). Below we highlighted  
2 colocalizations in a few genomic regions. All these loci have been replicated at nominal  
3 significance level in our validation GWAS.

4

5 We found a colocalization with Alzheimer's disease at rs429358 (19q13.32), one of the  
6 two variants in the *APOE*  $\epsilon$ 4 locus (**Fig. 4A**). In both resting and task fMRI, the secondary  
7 visual network had the strongest association with rs429358 (**Fig. 4B** and **Fig. S51A**). The  
8 allele associated with increased risk for Alzheimer's disease ("C") was associated with  
9 decreased functional connectivity in visual cortex (**Fig. S52**). Visual deficits were one of  
10 the first symptoms of Alzheimer's disease<sup>57</sup> and functional connectivity deficits in the  
11 visual cortex have been reported in Alzheimer's disease<sup>58,59</sup>. Decreased eigenvector  
12 centrality in visual cortex was associated with *APOE*  $\epsilon$ 4 carriership among normal elderly  
13 subjects<sup>60</sup>. In addition, the risk allele at rs429358 was associated with decreased default  
14 mode activity at the Bonferroni significance level in variant-specific analysis ( $3.86 \times 10^{-7}$ ,  
15  $0.05/64,620/2$ ), with distinct patterns in resting and task fMRI. In resting fMRI, the  
16 associations were mainly in the visual cluster and the left/right 10d areas (in the superior  
17 frontal). Decreased default mode network connectivity in the posterior cingulate  
18 cortex/precuneus, orbital and middle frontal cortex, and inferior parietal lobe in *APOE*  $\epsilon$ 4  
19 carriers is consistently reported in various studies across adulthood (see Section 3.3.1 and  
20 Table 2 of Foo, et al. <sup>31</sup>). Regardless of *APOE* carrier status, results from previous studies  
21 are consistent in finding decreased functional connectivity in the default mode network  
22 in subjects with Alzheimer's disease and mild cognitive impairment, as summarized in  
23 Dennis and Thompson <sup>61</sup> and Badhwar, et al. <sup>19</sup>. For task fMRI, most of the significant  
24 rs429358 effects were on the interactions between the visual cluster and a few areas in  
25 the frontal cluster, including the left/right p32 (in the medial superior frontal), a24 (in the  
26 pregenual anterior cingulate cortex), and 8Ad (in the superior frontal) areas (**Fig. S51B**).  
27 The reduced deactivation of the default mode network during tasks has been consistently  
28 observed in different stages of Alzheimer's disease<sup>62</sup> and normal carriers of the *APOE*  $\epsilon$ 4<sup>63</sup>.  
29 Biologically, amyloid- $\beta$  ( $A\beta$ ) accumulation preferentially starts in several of the core  
30 regions of the default mode network, and the earliest  $A\beta$  accumulation is further  
31 associated with hypoconnectivity within the default mode network and between default  
32 mode network and the frontoparietal network<sup>64</sup>. Additionally, we found the risk allele at

1 rs429358 decreased the functional connectivity of middle temporal areas in the language  
2 network (e.g., the left/right TPOJ and STSdp) and the left IPO area (in the middle occipital)  
3 of the dorsal attention network in task fMRI, but not in resting fMRI (**Fig. S53**). We also  
4 tested the association between rs429358 and MRI traits of other imaging modalities,  
5 including structural connectivity traits from dMRI<sup>46</sup> and regional brain volumes from  
6 structural MRI (sMRI)<sup>65</sup>. The fMRI traits had much stronger associations (smaller *P* values)  
7 with rs429358 than these structural traits. Together, these results suggest the fMRI traits  
8 of brain functions, especially the ones from the visual cortex in the secondary visual and  
9 default mode networks, might be more directly related to the genetic pathways of *APOE*  
10  $\epsilon$ 4 to Alzheimer's disease than brain morphology. These fMRI traits could be used as  
11 imaging biomarkers in etiologic study of Alzheimer's disease and drug development  
12 targeting *APOE*  $\epsilon$ 4.

13

14 In the 17p11.2 and 2p16.1 regions, we observed colocalizations between the default  
15 mode network and multiple psychiatric disorders, including schizophrenia<sup>66,67</sup>, autism  
16 spectrum disorder<sup>68</sup>, MDD<sup>69</sup>, and epilepsy<sup>70</sup>. For example, we tagged the rs4273100  
17 (nearest gene *EPN2*, 17p11.2) and rs1518395 (*VRK2*, 2p16.1), which have been implicated  
18 with schizophrenia (**Fig. S54**). Rs1518395 was also a risk variant for MDD and the  
19 rs2947349 (*VRK2*, 2p16.1) was associated with epilepsy. In resting fMRI, all three index  
20 variants exhibited the strongest associations with the default mode network, especially  
21 the frontal cluster (**Figs. S55-S56**). In addition, we observed colocalizations with cognitive  
22 ability and education<sup>71</sup> in the 17p11.2 region (e.g., rs12602286, *EPN2*) and with  
23 psychological traits (e.g., neuroticism<sup>72</sup> and subjective well-being<sup>73</sup>, rs2678897, *VRK2*) in  
24 the 2p16.1 region, which were also mainly related to the default mode network (**Fig. S57**).

25

26 In the 10q23.33 and 6q16.1 regions, our identified variants tagged those that have been  
27 implicated with migraine<sup>74,75</sup> (**Fig. 4C** and **Fig. S58**). For example, the index variant  
28 rs11187838 (*PLCE1*, 10q23.33) affected multiple networks and had the strongest  
29 associations in the auditory and cingulo-opercular networks (**Fig. S59**). The index variant  
30 rs11759769 (*FHL5*, 6q16.1) was mainly associated with the auditory, cingulo-opercular,  
31 and ventral multimodal networks in resting fMRI (**Fig. S60**). We also found colocalizations  
32 with brain aneurysm<sup>76</sup> in rs11187838 and with cerebral blood flow<sup>77</sup> in rs2971609 (*FHL5*,

1 6q16.1). Migraine is a heterogeneous disorder and no neuroimaging biomarker has been  
2 well established in previous small sample fMRI studies<sup>78</sup>. Our results may help identify  
3 whether the risk variants of migraine predispose to migraine in particular brain regions or  
4 networks. Specifically, our findings suggest the genetic overlaps among migraine,  
5 cerebrovascular traits, and brain function across multiple networks and highlight the  
6 enrichment in the auditory and cingulo-opercular networks.

7  
8 Colocalizations with cognitive ability<sup>71</sup>, intelligence<sup>79</sup>, and education<sup>71</sup> were observed in  
9 the 10q26.13, 5q15, and 3p11.1 regions (**Fig. S61**). The index variants of these cognitive  
10 traits were associated with a few specific functional areas in the temporal and parietal  
11 lobes. For example, in the 10q26.13 locus, our tagged variants associated with math  
12 ability, education<sup>71</sup>, and cocaine dependence<sup>80</sup> (rs2629540, *FAM53B*). Rs2629540 variant  
13 was particularly associated with the precuneus-related areas in different networks, such  
14 as the right PCV in the posterior multimodal network, the left/right 7Pm in the  
15 frontoparietal network, and the right 31pd in the default mode network (**Fig. S62**). The  
16 precuneus is involved in a variety of complex functions and responds to a wide variety of  
17 cognitive processes<sup>81</sup>. In the 5q15 region, we observed colocalizations with cognitive  
18 performance, math ability, and education<sup>71</sup> (rs114468556, *NR2F1*), most of which were  
19 related to the left/right TPOJ2 areas (in the middle temporal) of the posterior multimodal  
20 network (**Fig. S63A**). The *NR2F1* is well studied in the arealization of the cerebral cortex<sup>82</sup>.  
21 In the 3p11.1, we found colocalizations with intelligence<sup>79</sup> (rs7652296, *EPHA3*). The  
22 *EPHA3* is involved in axon guidance<sup>83</sup> and the rs7652296 was mainly associated with  
23 between-network connectivity of a few temporal and parietal areas, such as the right PSL  
24 (Perisylvian language area, in the superior temporal) and the left PF (in the supramarginal)  
25 of the cingulo-opercular network; the left PHT (in the middle temporal) of the dorsal  
26 attention network; the right PFm (in the inferior parietal) and the left TE1p (in the inferior  
27 temporal and middle temporal) of the frontoparietal network; the left PSL (in the superior  
28 temporal) and the right STSdp (in the middle temporal) of the language network; and the  
29 left PGs (in the angular) of the default mode network (**Fig. S63B**). These findings partially  
30 support the parieto-frontal integration theory of intelligence<sup>84,85</sup>, uncovering the genetic  
31 overlaps between cognitive functions and specific temporal and parietal functional areas.

32

1 In addition, we found colocalized genetic effects with psychological traits (e.g., risk-taking  
2 behaviors<sup>86</sup>) in the 3q24 (rs2279829, *ZIC4*) and 3p12.1 (rs6762267, *CADM2*) regions (**Fig.**  
3 **S64**). Rs2279829 and rs6762267 were mainly related to the interactions among the  
4 frontoparietal, cingulo-opercular, and default mode networks, with the strongest genetic  
5 effects being on a few frontal areas (e.g., the left/right i6-8, left/right p9-46v, left a10p,  
6 right p24, right PEF). Increasing evidence suggests the frontal lobe plays an important role  
7 in risk-taking and risk behaviors<sup>87</sup> (**Fig. S65**). Finally, the 2q14.1 region had colocalizations  
8 with insomnia<sup>88</sup> and sleep traits<sup>89</sup> (rs62158170, *PAX8*, **Fig. 4D**). The strongest genetic  
9 effects were on the somatomotor network (**Fig. 4E**). In summary, brain functions  
10 measured in fMRI has substantial area-specific genetic overlaps with complex brain traits  
11 and clinical outcomes. Uncovering the detailed genetic colocalized patterns may help  
12 understand how alterations in specific brain functions lead to risk for brain conditions and  
13 disorders.

14

15 To further explore the genetic links, we examined the genetic correlations<sup>55</sup> between  
16 fMRI traits and 50 complex traits, most of which were colocalized traits in the above  
17 association lookups, as well as additionally mental health traits and major brain disorders.  
18 First, we examined the genetic correlations with 4 global functional connectivity and  
19 amplitude traits (2 trait for resting and 2 for task). At the FDR 5% level ( $4 \times 50$  tests), we  
20 found the global fMRI traits were significantly associated with hypertension, neuroticism  
21 (e.g., feeling nervous, worry), sleep traits, and task-taking behaviors (e.g., automobile  
22 speeding) (**Table S8**). For example, resting functional connectivity was negatively  
23 correlated with neuroticism (feeling nervous) (GC = -0.181,  $P < 1.14 \times 10^{-4}$ ) and sleep  
24 duration (GC = -0.173,  $P < 1.58 \times 10^{-4}$ ). Hypertension was negatively correlated with the  
25 global amplitude in task fMRI (GC = -0.282,  $P < 7.34 \times 10^{-6}$ ).

26

27 Next, we explored the spatial patterns of genetic overlaps by evaluating the genetic  
28 correlations between complex traits and 8,531 functional connectivity. Enrichment of  
29 overlaps in specific brain functional areas and networks were observed in resting fMRI.  
30 For example, at the FDR 5% level (8,531 tests), cognitive function had genetic correlations  
31 with cognitive networks (the cingulo-opercular, default mode, frontoparietal, and dorsal  
32 attention), such as the right IFSa area (in the triangular part of inferior frontal) (**Fig. 5A**).

1 Most of the significant genetic correlations were negative, which suggest genetic effects  
2 predispose to less resting connectivity is associated with increased intelligence. For  
3 schizophrenia and cross-disorder<sup>90</sup>, we found consistent positive genetic correlations  
4 with the default mode network (e.g., the left/right 47s in the posterior orbital and the  
5 left/right 8BL in the medial superior frontal) and negative genetic correlations with the  
6 secondary visual network (e.g., the left/right LIPv in the superior parietal) (**Fig. 5B** and **Fig.**  
7 **S66**). Similarly, we found neuroticism (feeling nervous) had positive genetic correlations  
8 with the default mode network (e.g., the right PGI in the angular) and negative genetic  
9 correlations with the secondary visual network (e.g., the right FST in the middle temporal  
10 and the right VMV3 in the fusiform) (**Fig. S67**).

11

12 Task fMRI provided additional insights into the genetic correlations with cognitive  
13 function (**Fig. 5C**). Similar to resting fMRI, the default mode network had negative genetic  
14 correlations with cognitive function. The correlations were enriched in the connectivity  
15 between the visual cluster and the frontal cluster (**Fig. S68A**). Moreover, the secondary  
16 visual and somatomotor networks (e.g., the right V6 in the cuneus, the left VMV2 in the  
17 lingual, the left VIP in the superior parietal, and the right OP2-3 in in Rolandic operculum  
18 and insula) had positive genetic correlations with cognitive function (**Fig. S68B**). In  
19 summary, these results show the default mode network has negative genetic correlations  
20 with cognition and positive genetic correlations with brain disorders and neuroticism. The  
21 genetic correlations with cognition had opposite directions in the default mode network  
22 and the secondary visual network in task fMRI, pointing to genetic influences on task  
23 specific brain activity. Patterns of other complex traits (e.g., snoring, sleep during,  
24 hypertension, general risk tolerance, and education) were summarized in the  
25 **Supplementary Note** and **Figures S69-S70**. In summary, this section provides several lines  
26 of evidence for the shared genetic influences between brain functions and complex traits  
27 and diseases. Discovering such genetic co-variations in specific brain areas and networks  
28 might improve our understanding of how the brain function is affected by genetic risk  
29 factors and aid early detection and timely treatment of brain diseases.

30

31 **Gene-level analysis and biological annotations.**

1 Using GWAS summary statistics of network level fMRI traits, MAGMA<sup>91</sup> detected 67  
2 significant genes with 352 associations ( $P < 1.34 \times 10^{-9}$ , adjusted for 1,985 phenotypes)  
3 (**Table S9**). We performed some functional lookups for these genes. First, nine genes  
4 (*SSH2*, *CADM2*, *FAT3*, *ANO1*, *CSMD3*, *HELLS*, *CTR9*, *KANSL1*, and *ETV1*) had a high  
5 probability of being loss-of-function (LoF) intolerant<sup>92</sup> ( $pLI > 0.98$ ), indicating its extremely  
6 intolerant of LoF variation. Second, 24 (*UFL1*, *MEF2C*, *CPED1*, *TBC1D12*, *KANSL1*, *CRHR1*,  
7 *RNF112*, *TBC1D5*, *ANKRD32*, *DGKB*, *HSPG2*, *ZIC1*, *GRAP*, *MFAP4*, *FADD*, *NOC3L*, *CADM2*,  
8 *LRRC37A*, *EFCAB5*, *PLCB1*, *FAM53B*, *METTL10*, *ARL17B*, and *STH*) of the 67 genes were also  
9 identified by a recent eQTL study of developing human brain<sup>93</sup>. Moreover, in the  
10 constructed transcriptional networks<sup>94</sup>, *FAT3*, *MEF2C*, *CRHR1*, *NR2F1* and *VRK2* were  
11 within the *adult neurons, synaptic transmission, and neuron projection development*  
12 function module; *SSH2*, *HSPG2*, and *KANSL1* were within the *superficial layer neurons and*  
13 *splicing* module; and *CADM2*, *PIP5K1B*, *ZIC1*, *CXXC4*, *ANKRD32*, *CSMD3* and *GNA12* were  
14 within *developing neurons and axon guidance* module. These results indicate the fMRI-  
15 associated genes have potential functions in biological processes of brain development  
16 and healthy aging. In addition, we applied FUMA<sup>95</sup> to map significant variants ( $P < 2.51 \times$   
17  $10^{-11}$ ) to genes via physical position, eQTL association, and 3D chromatin (Hi-C)  
18 interaction. FUMA yielded 226 associated genes, 168 of which were not discovered in  
19 MAGMA (**Table S10**). In addition, 5 of the fMRI-associated genes (*CALY*, *SLC47A1*, *SLC6A4*,  
20 *CYP2C8*, and *CYP2C9*) were targets for 51 nervous system drugs<sup>96</sup> (anatomical therapeutic  
21 chemical (ATC) code starts with “N”), such as 29 anti-depressants (N06A) to treat major  
22 depression disorder and related conditions, 13 anti-psychotics drugs (N05A) to manage  
23 psychosis, 4 psychostimulants (N06B) for ADHD and nootropics, and 2 anti-migraine  
24 (N02C) (**Table S11**).

25

26 To identify brain cell types where genetic variation leads to changes in brain function, we  
27 performed partitioned heritability analyses<sup>97</sup> for cell type specific regulatory elements.  
28 Specifically, we estimated partitioned heritability enrichment within differentially  
29 accessible chromatin of neurons (NeuN+, including two subtypes GABAergic  
30 [NeuN+/Sox6+] and glutamatergic neurons [NeuN+/Sox6-]) and glial cells (NeuN-,  
31 including oligodendrocyte [NeuN-/Sox10+], microglia and astrocyte [NeuN-/Sox10-])<sup>98</sup>. To  
32 identify global enrichment across the whole brain, we performed partitioned heritability

1 using global functional connectivity and amplitude traits in resting fMRI. As expected, we  
2 found enrichment of functional connectivity and amplitude in neuronal regulatory  
3 elements but not in glial (**Fig. 6A**). For further resolution across brain networks, we also  
4 performed enrichment analysis for the mean amplitude of the 12 networks. Neuronal  
5 enrichment was observed in most networks and the strongest enrichment was found in  
6 the posterior multimodal network (**Fig. 6B**). Overall, these results indicate that common  
7 variants associated with brain functional activity alter the function of regulatory elements  
8 in neurons, the cell type expected to influence brain functional interactions, supporting  
9 the biological validity of the identified genetic associations.

### 11 **Intelligence prediction by integrating genetic and multi-modality MRI data.**

12 One ultimate goal in brain imaging genetics is to develop prediction models for brain  
13 complex traits and disorders<sup>99-101</sup>. In this section, we performed prediction for fluid  
14 intelligence using common genetic variants and neuroimaging traits from multiple  
15 modalities, including resting fMRI, task fMRI, dMRI, and sMRI. We examined the joint  
16 performance and relative contributions of these data types in a training, validation, and  
17 testing design (Methods). The genetic effects were aggregated using polygenic risk scores  
18 (PRS) via PRS-CS<sup>102</sup> and the effects of imaging traits were estimated in ridge regression via  
19 glmnet<sup>103</sup>. All model parameters were tuned using the validation data and we evaluated  
20 the prediction performance on the independent testing data by calculating the  
21 correlation between the predicted values and the observed intelligence, while adjusting  
22 for the covariates.

24 The prediction performance was summarized in **Figure 6C**. The prediction correlation of  
25 genetic PRS is 0.228 (standard error = 0.019), suggesting that about 5.2% variation in fluid  
26 intelligence can be predicted by common genetic variants. The prediction correlation  
27 resting fMRI was 0.234, which was similar to that of task fMRI (correlation = 0.233). The  
28 performance was improved to 0.296 by jointly using resting and task fMRI, which suggests  
29 resting and task fMRI had unique contributions to intelligence prediction. The dMRI and  
30 sMRI traits had much lower prediction accuracy than fMRI traits. Specifically, the  
31 prediction correlation was 0.105 for diffusion tensor imaging (DTI) parameters and 0.08  
32 for regional brain volumes. Moreover, adding these structural traits in addition to fMRI

1 traits did not significantly improve the prediction performance (correlation = 0.299),  
2 indicating the prediction power of structural traits for intelligence can be largely captured  
3 by the functional traits. More importantly, by using both of the genetic PRS and  
4 neuroimaging traits, the prediction correlation moved up to 0.347, which was much  
5 higher than only using one of the two data types. These results illustrate the  
6 neuroimaging traits, especially the ones from resting and task fMRI, can substantially  
7 improve the prediction accuracy of intelligence on top of genetic PRS. Future studies can  
8 integrate genetic PRS and multi-modality MRI data for better prediction of brain  
9 conditions.

10

## 11 **DISCUSSION**

12 Using resting and task fMRI data from the UK Biobank, we provided fine details of genetic  
13 influences on cerebral cortex functional architectures through a parcellation-based  
14 approach. We showed the similarities and differences of the genetic architecture of  
15 intrinsic and extrinsic functional organizations in heritability analysis, association analysis,  
16 genetic links with cognition and disease, and prediction models of intelligence. Genetic  
17 colocalization and correlation analyses uncovered important brain functional areas and  
18 networks that were genetically implicated in specific diseases and traits, such as the  
19 substantial genetic links between the visual cortex and the Alzheimer's disease.

20

21 At group mean level, prior literature has demonstrated that the intrinsic and extrinsic  
22 functional architectures are highly similar with small but consistent differences<sup>50,104-108</sup>.  
23 These task-related changes are essential for the human brain to adaptively alter its  
24 functionality via rapid changes in inter-regional functional connectivity<sup>50</sup>. Using large-  
25 scale individual level data in the UK Biobank, we showed the overall genetic similarity  
26 between resting and task fMRI (e.g., mean genetic correlation = 0.7). Although the genetic  
27 differences between resting and task fMRI are small, multiple lines of evidence suggest  
28 such differences could be important and are genetically related to cognition and brain  
29 diseases. For example, cognitive function had genetic correlations with the secondary  
30 visual and somatomotor networks during task performance, but not at rest. Moreover,  
31 our prediction analysis illustrated that jointly using resting and task fMRI resulted in



1 higher prediction accuracy, indicating there were distinct cognition-related components  
2 in resting and task fMRI.

3

4 Although many efforts have been made to understand the functional organizations of the  
5 human brain, there is no one widely-accepted standard pipeline for functional  
6 connectivity analysis in fMRI<sup>99</sup>. Our study is one of the first attempts to study the genetic  
7 architecture of brain functions using a parcellation-based approach in biobank-scale  
8 dataset. Compared to the recent whole brain ICA-based studies<sup>32,34</sup>, our parcellation-  
9 based approach was able to uncover high-resolution fine details on the genetic effect  
10 patterns and enable the comparison between intrinsic and extrinsic functional  
11 architectures. However, there are still a few limitations in the present study. First, the  
12 UKB participants were mostly middle-aged to elderly Europeans. Although we have  
13 illustrated the overall consistency of group mean maps between the HCP and UKB  
14 cohorts, nonlinear aging effects on brain functional connectivity have been widely  
15 observed<sup>109</sup>. It is of great interest to study the gene-age interactions and evaluate the  
16 generalizability of UKB results across the lifespan<sup>110</sup>. It is also interesting to investigate  
17 the population-specific genetic components when more large-scale fMRI data from global  
18 populations become available<sup>111</sup>. Second, the UKB task fMRI data were from a single  
19 emotion processing task<sup>42,43</sup>. Although previous studies have shown that the functional  
20 architectures of different tasks were highly similar<sup>50,104,106</sup>, multi-task fMRI data may  
21 provide new insights in genetic studies. It might be possible to impute/predict multi-task  
22 fMRI data for UKB using the multi-task HCP data as training reference panels. To enable  
23 comparison between resting and task fMRI, our study focused on functional connectivity  
24 traits. It is also of great interest to study the genetics influences on task activation  
25 measures/maps for task fMRI. In addition, fMRI traits show lower reproducibility than  
26 structural MRI traits and this may account for their decreased heritability. New feature  
27 extraction pipeline might help improve the reproducibility by jointly analyzing resting  
28 functional connectivity, task functional connectivity, and structural connectivity. Finally,  
29 we performed functional connectivity analyses using the full correlation measures  
30 extracted from the Glasser360 atlas. Future work is needed to evaluate the consistency  
31 of results between full and partial correlations and compare the Glasser360 atlas with  
32 other common brain parcellations<sup>4-8</sup> in the large-scale UKB dataset.

1  
2  
3  
4  
5  
6  
7  
8  
9  
10  
11  
12  
13  
14  
15  
16  
17  
18  
19  
20  
21  
22  
23  
24  
25  
26  
27  
28  
29  
30  
31  
32

**METHODS**

Methods are available in the *Methods* section.  
*Note: One supplementary information pdf file, one supplementary figure pdf file, and one supplementary table zip file are available.*

**ACKNOWLEDGEMENTS**

This research was partially supported by U.S. NIH grants MH086633 (HT.Z.) and MH116527 (TF.L. and HP.Z.). We thank the individuals represented in the UK Biobank and HCP studies for their participation and the research teams for their work in collecting, processing and disseminating these datasets for analysis. We thank Doug Crabill for helpful conversations on computing. We would like to thank the University of North Carolina at Chapel Hill and Purdue University and their Research Computing group for providing computational resources and support that have contributed to these research results. We gratefully acknowledge all the studies and databases that made GWAS summary data available. This research has been conducted using the UK Biobank resource (application number 22783), subject to a data transfer agreement. HCP data were provided by the Human Connectome Project, WU-Minn Consortium (Principal Investigators: David Van Essen and Kamil Ugurbil; 1U54MH091657) funded by the 16 NIH Institutes and Centers that support the NIH Blueprint for Neuroscience Research; and by the McDonnell Center for Systems Neuroscience at Washington University.

**AUTHOR CONTRIBUTIONS**

B.Z., HT.Z., J.L.S., and S.M.S. designed the study. B.Z., TF.L., Y.Y., D.X., X.W., Z.Z., TY. L, Z.W., and Z.F. analyzed the data. TF. L., Z.Z., and Y.S. downloaded the datasets, processed fMRI data, and undertook quantity controls. Y.L. and HP.Z. provided feedback on study design and results interpretation. B.Z. wrote the manuscript with feedback from all authors.

**CORRESPONDENCE AND REQUESTS FOR MATERIALS** should be addressed to HT.Z.

**COMPETETING FINANCIAL INTERESTS**

1 The authors declare no competing financial interests.

2

### 3 REFERENCES

- 4 1. Glasser, M.F. *et al.* A multi-modal parcellation of human cerebral cortex. *Nature*  
5 **536**, 171-178 (2016).
- 6 2. Van Essen, D.C., Glasser, M.F., Dierker, D.L., Harwell, J. & Coalson, T.  
7 Parcellations and hemispheric asymmetries of human cerebral cortex analyzed  
8 on surface-based atlases. *Cerebral cortex* **22**, 2241-2262 (2012).
- 9 3. Bijsterbosch, J. *et al.* Challenges and future directions for representations of  
10 functional brain organization. *Nature neuroscience* **23**, 1484-1495 (2020).
- 11 4. Shen, X., Tokoglu, F., Papademetris, X. & Constable, R.T. Groupwise whole-brain  
12 parcellation from resting-state fMRI data for network node identification.  
13 *Neuroimage* **82**, 403-415 (2013).
- 14 5. Yeo, B.T. *et al.* The organization of the human cerebral cortex estimated by  
15 intrinsic functional connectivity. *Journal of neurophysiology* (2011).
- 16 6. Tzourio-Mazoyer, N. *et al.* Automated anatomical labeling of activations in SPM  
17 using a macroscopic anatomical parcellation of the MNI MRI single-subject brain.  
18 *Neuroimage* **15**, 273-289 (2002).
- 19 7. Desikan, R.S. *et al.* An automated labeling system for subdividing the human  
20 cerebral cortex on MRI scans into gyral based regions of interest. *Neuroimage*  
21 **31**, 968-980 (2006).
- 22 8. Power, J.D. *et al.* Functional network organization of the human brain. *Neuron*  
23 **72**, 665-678 (2011).
- 24 9. Eickhoff, S.B., Yeo, B.T. & Genon, S. Imaging-based parcellations of the human  
25 brain. *Nature Reviews Neuroscience* **19**, 672-686 (2018).
- 26 10. Biswal, B., Zerrin Yetkin, F., Houghton, V.M. & Hyde, J.S. Functional connectivity  
27 in the motor cortex of resting human brain using echo-planar MRI. *Magnetic*  
28 *resonance in medicine* **34**, 537-541 (1995).
- 29 11. Belliveau, J. *et al.* Functional mapping of the human visual cortex by magnetic  
30 resonance imaging. *Science* **254**, 716-719 (1991).
- 31 12. Lv, H. *et al.* Resting-state functional MRI: everything that nonexperts have always  
32 wanted to know. *American Journal of Neuroradiology* **39**, 1390-1399 (2018).

- 1 13. Smitha, K. *et al.* Resting state fMRI: A review on methods in resting state  
2 connectivity analysis and resting state networks. *The neuroradiology journal* **30**,  
3 305-317 (2017).
- 4 14. Lee, M.H., Smyser, C.D. & Shimony, J.S. Resting-state fMRI: a review of methods  
5 and clinical applications. *American Journal of neuroradiology* **34**, 1866-1872  
6 (2013).
- 7 15. Ji, J.L. & Anticevic, A. Functional MRI in psychiatric disorders. (2019).
- 8 16. Canario, E., Chen, D. & Biswal, B. A review of resting-state fMRI and its use to  
9 examine psychiatric disorders. *Psychoradiology* **1**, 42-53 (2021).
- 10 17. Mwansisya, T.E. *et al.* Task and resting-state fMRI studies in first-episode  
11 schizophrenia: A systematic review. *Schizophrenia research* **189**, 9-18 (2017).
- 12 18. Hu, M.-L. *et al.* A review of the functional and anatomical default mode network  
13 in schizophrenia. *Neuroscience bulletin* **33**, 73-84 (2017).
- 14 19. Badhwar, A. *et al.* Resting-state network dysfunction in Alzheimer's disease: a  
15 systematic review and meta-analysis. *Alzheimer's & Dementia: Diagnosis,*  
16 *Assessment & Disease Monitoring* **8**, 73-85 (2017).
- 17 20. Wolters, A.F. *et al.* Resting-state fMRI in Parkinson's disease patients with  
18 cognitive impairment: A meta-analysis. *Parkinsonism & Related Disorders* **62**, 16-  
19 27 (2019).
- 20 21. Philip, R.C. *et al.* A systematic review and meta-analysis of the fMRI investigation  
21 of autism spectrum disorders. *Neuroscience & Biobehavioral Reviews* **36**, 901-  
22 942 (2012).
- 23 22. Mulders, P.C., van Eijndhoven, P.F., Schene, A.H., Beckmann, C.F. & Tendolkar, I.  
24 Resting-state functional connectivity in major depressive disorder: a review.  
25 *Neuroscience & Biobehavioral Reviews* **56**, 330-344 (2015).
- 26 23. Elliott, M.L. *et al.* General functional connectivity: Shared features of resting-  
27 state and task fMRI drive reliable and heritable individual differences in  
28 functional brain networks. *NeuroImage* **189**, 516-532 (2019).
- 29 24. Ge, T., Holmes, A.J., Buckner, R.L., Smoller, J.W. & Sabuncu, M.R. Heritability  
30 analysis with repeat measurements and its application to resting-state functional  
31 connectivity. *Proceedings of the National Academy of Sciences* **114**, 5521-5526  
32 (2017).

- 1 25. Yang, Z. *et al.* Genetic and environmental contributions to functional  
2 connectivity architecture of the human brain. *Cerebral cortex* **26**, 2341-2352  
3 (2016).
- 4 26. Miranda-Dominguez, O. *et al.* Heritability of the human connectome: A  
5 connectotyping study. *Network Neuroscience* **2**, 175-199 (2018).
- 6 27. Adhikari, B.M. *et al.* Heritability estimates on resting state fMRI data using  
7 ENIGMA analysis pipeline. (2018).
- 8 28. Blokland, G.A. *et al.* Quantifying the heritability of task-related brain activation  
9 and performance during the N-back working memory task: a twin fMRI study.  
10 *Biological psychology* **79**, 70-79 (2008).
- 11 29. Colclough, G.L. *et al.* The heritability of multi-modal connectivity in human brain  
12 activity. *Elife* **6**, e20178 (2017).
- 13 30. Teeuw, J. *et al.* Genetic and environmental influences on functional connectivity  
14 within and between canonical cortical resting-state networks throughout  
15 adolescent development in boys and girls. *Neuroimage* **202**, 116073 (2019).
- 16 31. Foo, H. *et al.* Genetic influence on ageing-related changes in resting-state brain  
17 functional networks in healthy adults: a systematic review. *Neuroscience &*  
18 *Biobehavioral Reviews* (2020).
- 19 32. Elliott, L.T. *et al.* Genome-wide association studies of brain imaging phenotypes  
20 in UK Biobank. *Nature* **562**, 210-216 (2018).
- 21 33. Grasby, K.L. *et al.* The genetic architecture of the human cerebral cortex. *Science*  
22 **367**(2020).
- 23 34. Smith, S.M. *et al.* An expanded set of genome-wide association studies of brain  
24 imaging phenotypes in UK Biobank. *Nature neuroscience* **24**, 737-745 (2021).
- 25 35. Zhao, B. *et al.* Common genetic variation influencing human white matter  
26 microstructure. *Science* **372**(2021).
- 27 36. Matoba, N. & Stein, J.L. From base pair to brain. *Nature Neuroscience* **24**, 619-  
28 621 (2021).
- 29 37. Zhao, B. *et al.* Common variants contribute to intrinsic human brain functional  
30 networks. *bioRxiv* (2020).

- 1 38. Beckmann, C.F. & Smith, S.M. Probabilistic independent component analysis for  
2 functional magnetic resonance imaging. *IEEE transactions on medical imaging*  
3 **23**, 137-152 (2004).
- 4 39. Hyvarinen, A. Fast and robust fixed-point algorithms for independent component  
5 analysis. *IEEE transactions on Neural Networks* **10**, 626-634 (1999).
- 6 40. Alfaro-Almagro, F. *et al.* Image processing and Quality Control for the first 10,000  
7 brain imaging datasets from UK Biobank. *NeuroImage* **166**, 400-424 (2018).
- 8 41. Sudlow, C. *et al.* UK biobank: an open access resource for identifying the causes  
9 of a wide range of complex diseases of middle and old age. *PLoS Medicine* **12**,  
10 e1001779 (2015).
- 11 42. Hariri, A.R., Tessitore, A., Mattay, V.S., Fera, F. & Weinberger, D.R. The amygdala  
12 response to emotional stimuli: a comparison of faces and scenes. *Neuroimage*  
13 **17**, 317-323 (2002).
- 14 43. Barch, D.M. *et al.* Function in the human connectome: task-fMRI and individual  
15 differences in behavior. *Neuroimage* **80**, 169-189 (2013).
- 16 44. Somerville, L.H. *et al.* The Lifespan Human Connectome Project in Development:  
17 A large-scale study of brain connectivity development in 5–21 year olds.  
18 *NeuroImage* **183**, 456-468 (2018).
- 19 45. Ji, J.L. *et al.* Mapping the human brain's cortical-subcortical functional network  
20 organization. *Neuroimage* **185**, 35-57 (2019).
- 21 46. Zhao, B. *et al.* Common genetic variation influencing human white matter  
22 microstructure. *bioRxiv* (2020).
- 23 47. Yang, J., Lee, S.H., Goddard, M.E. & Visscher, P.M. GCTA: a tool for genome-wide  
24 complex trait analysis. *The American Journal of Human Genetics* **88**, 76-82  
25 (2011).
- 26 48. Türe, U., Yaşargil, D.C., Al-Mefty, O. & Yaşargil, M.G. Topographic anatomy of the  
27 insular region. *Journal of neurosurgery* **90**, 720-733 (1999).
- 28 49. Nieuwenhuys, R. The insular cortex: a review. *Progress in brain research* **195**,  
29 123-163 (2012).
- 30 50. Cole, M.W., Ito, T., Cocuzza, C. & Sanchez-Romero, R. The functional relevance of  
31 task-state functional connectivity. *Journal of Neuroscience* **41**, 2684-2702 (2021).

- 1 51. Fox, M.D. & Raichle, M.E. Spontaneous fluctuations in brain activity observed  
2 with functional magnetic resonance imaging. *Nature reviews neuroscience* **8**,  
3 700-711 (2007).
- 4 52. Bulik-Sullivan, B.K. *et al.* LD Score regression distinguishes confounding from  
5 polygenicity in genome-wide association studies. *Nature genetics* **47**, 291-295  
6 (2015).
- 7 53. de Klein, N. *et al.* Brain expression quantitative trait locus and network analysis  
8 reveals downstream effects and putative drivers for brain-related diseases.  
9 *bioRxiv* (2021).
- 10 54. Hormozdiari, F. *et al.* Colocalization of GWAS and eQTL signals detects target  
11 genes. *The American Journal of Human Genetics* **99**, 1245-1260 (2016).
- 12 55. Bulik-Sullivan, B. *et al.* An atlas of genetic correlations across human diseases  
13 and traits. *Nature Genetics* **47**, 1236-1241 (2015).
- 14 56. Buniello, A. *et al.* The NHGRI-EBI GWAS Catalog of published genome-wide  
15 association studies, targeted arrays and summary statistics 2019. *Nucleic Acids*  
16 *Research* **47**, D1005-D1012 (2018).
- 17 57. Brewer, A.A. & Barton, B. Visual cortex in aging and Alzheimer's disease: changes  
18 in visual field maps and population receptive fields. *Frontiers in psychology* **5**, 74  
19 (2014).
- 20 58. Zhang, H.-Y. *et al.* Resting brain connectivity: changes during the progress of  
21 Alzheimer disease. *Radiology* **256**, 598-606 (2010).
- 22 59. Wang, Z. *et al.* Functional connectivity changes across the spectrum of subjective  
23 cognitive decline, amnesic mild cognitive impairment and Alzheimer's disease.  
24 *Frontiers in neuroinformatics* **13**, 26 (2019).
- 25 60. Wink, A.M. *et al.* Functional brain network centrality is related to APOE genotype  
26 in cognitively normal elderly. *Brain and behavior* **8**, e01080 (2018).
- 27 61. Dennis, E.L. & Thompson, P.M. Functional brain connectivity using fMRI in aging  
28 and Alzheimer's disease. *Neuropsychology review* **24**, 49-62 (2014).
- 29 62. Palop, J.J. & Mucke, L. Network abnormalities and interneuron dysfunction in  
30 Alzheimer disease. *Nature Reviews Neuroscience* **17**, 777-792 (2016).

- 1 63. Filippini, N. *et al.* Distinct patterns of brain activity in young carriers of the APOE-  
2  $\epsilon 4$  allele. *Proceedings of the National Academy of Sciences* **106**, 7209-7214  
3 (2009).
- 4 64. Palmqvist, S. *et al.* Earliest accumulation of  $\beta$ -amyloid occurs within the default-  
5 mode network and concurrently affects brain connectivity. *Nature*  
6 *communications* **8**, 1-13 (2017).
- 7 65. Zhao, B. *et al.* Genome-wide association analysis of 19,629 individuals identifies  
8 variants influencing regional brain volumes and refines their genetic co-  
9 architecture with cognitive and mental health traits. *Nature genetics* **51**, 1637-  
10 1644 (2019).
- 11 66. Goes, F.S. *et al.* Genome-wide association study of schizophrenia in Ashkenazi  
12 Jews. *American Journal of Medical Genetics Part B: Neuropsychiatric Genetics*  
13 **168**, 649-659 (2015).
- 14 67. Li, Z. *et al.* Genome-wide association analysis identifies 30 new susceptibility loci  
15 for schizophrenia. *Nature Genetics* **49**, 1576-1583 (2017).
- 16 68. Consortium, T.A.S.D.W.G.o.T.P.G. Meta-analysis of GWAS of over 16,000  
17 individuals with autism spectrum disorder highlights a novel locus at 10q24. 32  
18 and a significant overlap with schizophrenia. *Molecular autism* **8**, 1-17 (2017).
- 19 69. Hyde, C.L. *et al.* Identification of 15 genetic loci associated with risk of major  
20 depression in individuals of European descent. *Nature genetics* **48**, 1031-1036  
21 (2016).
- 22 70. Consortium, T.I.L.A.E. Genetic determinants of common epilepsies: a meta-  
23 analysis of genome-wide association studies. *The Lancet. Neurology* **13**, 893  
24 (2014).
- 25 71. Lee, J.J. *et al.* Gene discovery and polygenic prediction from a genome-wide  
26 association study of educational attainment in 1.1 million individuals. *Nature*  
27 *Genetics* **50**, 1112–1121 (2018).
- 28 72. Kichaev, G. *et al.* Leveraging polygenic functional enrichment to improve GWAS  
29 power. *The American Journal of Human Genetics* **104**, 65-75 (2019).
- 30 73. Baselmans, B.M. *et al.* Multivariate genome-wide analyses of the well-being  
31 spectrum. *Nature genetics* **51**, 445-451 (2019).



- 1 74. Pickrell, J.K. *et al.* Detection and interpretation of shared genetic influences on  
2 42 human traits. *Nature genetics* **48**, 709 (2016).
- 3 75. Anttila, V. *et al.* Genome-wide meta-analysis identifies new susceptibility loci for  
4 migraine. *Nature genetics* **45**, 912 (2013).
- 5 76. Bakker, M.K. *et al.* Genome-wide association study of intracranial aneurysms  
6 identifies 17 risk loci and genetic overlap with clinical risk factors. *Nature*  
7 *genetics* **52**, 1303-1313 (2020).
- 8 77. Ikram, M.A. *et al.* Heritability and genome-wide associations studies of cerebral  
9 blood flow in the general population. *Journal of Cerebral Blood Flow &*  
10 *Metabolism* **38**, 1598-1608 (2018).
- 11 78. Skorobogatikh, K. *et al.* Functional connectivity studies in migraine: what have  
12 we learned? *The journal of headache and pain* **20**, 1-10 (2019).
- 13 79. Savage, J.E. *et al.* Genome-wide association meta-analysis in 269,867 individuals  
14 identifies new genetic and functional links to intelligence. *Nature Genetics* **50**,  
15 912-919 (2018).
- 16 80. Gelernter, J. *et al.* Genome-wide association study of cocaine dependence and  
17 related traits: FAM53B identified as a risk gene. *Molecular psychiatry* **19**, 717-  
18 723 (2014).
- 19 81. Cavanna, A.E. & Trimble, M.R. The precuneus: a review of its functional anatomy  
20 and behavioural correlates. *Brain* **129**, 564-583 (2006).
- 21 82. Cadwell, C.R., Bhaduri, A., Mostajo-Radji, M.A., Keefe, M.G. & Nowakowski, T.J.  
22 Development and arealization of the cerebral cortex. *Neuron* **103**, 980-1004  
23 (2019).
- 24 83. Nishikimi, M., Oishi, K., Tabata, H., Torii, K. & Nakajima, K. Segregation and  
25 pathfinding of callosal axons through EphA3 signaling. *Journal of Neuroscience*  
26 **31**, 16251-16260 (2011).
- 27 84. Jung, R.E. & Haier, R.J. The Parieto-Frontal Integration Theory (P-FIT) of  
28 intelligence: converging neuroimaging evidence. *Behavioral and Brain Sciences*  
29 **30**, 135 (2007).
- 30 85. Deary, I.J., Penke, L. & Johnson, W. The neuroscience of human intelligence  
31 differences. *Nature reviews neuroscience* **11**, 201-211 (2010).

- 1 86. Linnér, R.K. *et al.* Genome-wide association analyses of risk tolerance and risky  
2 behaviors in over 1 million individuals identify hundreds of loci and shared  
3 genetic influences. *Nature Genetics* **51**, 245-257 (2019).
- 4 87. Floden, D., Alexander, M.P., Kubu, C., Katz, D. & Stuss, D.T. Impulsivity and risk-  
5 taking behavior in focal frontal lobe lesions. *Neuropsychologia* **46**, 213-223  
6 (2008).
- 7 88. Jansen, P.R. *et al.* Genome-wide analysis of insomnia in 1,331,010 individuals  
8 identifies new risk loci and functional pathways. *Nature Genetics* **51**, 394-403  
9 (2019).
- 10 89. Doherty, A. *et al.* GWAS identifies 10 loci for objectively-measured physical  
11 activity and sleep with causal roles in cardiometabolic disease. *bioRxiv*, 261719  
12 (2018).
- 13 90. Consortium, C.-D.G.o.t.P.G. Identification of risk loci with shared effects on five  
14 major psychiatric disorders: a genome-wide analysis. *The Lancet* **381**, 1371-1379  
15 (2013).
- 16 91. de Leeuw, C.A., Mooij, J.M., Heskes, T. & Posthuma, D. MAGMA: generalized  
17 gene-set analysis of GWAS data. *PLoS Computational Biology* **11**, e1004219  
18 (2015).
- 19 92. Lek, M. *et al.* Analysis of protein-coding genetic variation in 60,706 humans.  
20 *Nature* **536**, 285 (2016).
- 21 93. Walker, R.L. *et al.* Genetic Control of Expression and Splicing in Developing  
22 Human Brain Informs Disease Mechanisms. *Cell* **179**, 750-771. e22 (2019).
- 23 94. Zhang, B. & Horvath, S. A General Framework for Weighted Gene Co-Expression  
24 Network Analysis. *Statistical Applications in Genetics & Molecular Biology* **4**, 1-43  
25 (2005).
- 26 95. Watanabe, K., Taskesen, E., Bochoven, A. & Posthuma, D. Functional mapping  
27 and annotation of genetic associations with FUMA. *Nature Communications* **8**,  
28 1826 (2017).
- 29 96. Wang, Q. *et al.* A Bayesian framework that integrates multi-omics data and gene  
30 networks predicts risk genes from schizophrenia GWAS data. *Nature*  
31 *neuroscience* **22**, 691 (2019).

- 1 97. Finucane, H.K. *et al.* Partitioning heritability by functional annotation using  
2 genome-wide association summary statistics. *Nature genetics* **47**, 1228-1235  
3 (2015).
- 4 98. Hauberg, M.E. *et al.* Common schizophrenia risk variants are enriched in open  
5 chromatin regions of human glutamatergic neurons. *Nature communications* **11**,  
6 1-16 (2020).
- 7 99. Pervaiz, U., Vidaurre, D., Woolrich, M.W. & Smith, S.M. Optimising network  
8 modelling methods for fMRI. *Neuroimage* **211**, 116604 (2020).
- 9 100. He, T. *et al.* Deep neural networks and kernel regression achieve comparable  
10 accuracies for functional connectivity prediction of behavior and demographics.  
11 *NeuroImage* **206**, 116276 (2020).
- 12 101. Shen, L. & Thompson, P.M. Brain imaging genomics: integrated analysis and  
13 machine learning. *Proceedings of the IEEE* **108**, 125-162 (2019).
- 14 102. Ge, T., Chen, C.-Y., Ni, Y., Feng, Y.-C.A. & Smoller, J.W. Polygenic Prediction via  
15 Bayesian Regression and Continuous Shrinkage Priors. *bioRxiv*, 416859 (2019).
- 16 103. Friedman, J., Hastie, T. & Tibshirani, R. Regularization paths for generalized linear  
17 models via coordinate descent. *Journal of statistical software* **33**, 1 (2010).
- 18 104. Cole, M.W., Bassett, D.S., Power, J.D., Braver, T.S. & Petersen, S.E. Intrinsic and  
19 task-evoked network architectures of the human brain. *Neuron* **83**, 238-251  
20 (2014).
- 21 105. Tavor, I. *et al.* Task-free MRI predicts individual differences in brain activity  
22 during task performance. *Science* **352**, 216-220 (2016).
- 23 106. Gonzalez-Castillo, J. & Bandettini, P.A. Task-based dynamic functional  
24 connectivity: Recent findings and open questions. *Neuroimage* **180**, 526-533  
25 (2018).
- 26 107. Gratton, C., Laumann, T.O., Gordon, E.M., Adeyemo, B. & Petersen, S.E. Evidence  
27 for two independent factors that modify brain networks to meet task goals. *Cell*  
28 *reports* **17**, 1276-1288 (2016).
- 29 108. Gratton, C. *et al.* Functional brain networks are dominated by stable group and  
30 individual factors, not cognitive or daily variation. *Neuron* **98**, 439-452. e5 (2018).
- 31 109. Dosenbach, N.U. *et al.* Prediction of individual brain maturity using fMRI. *Science*  
32 **329**, 1358-1361 (2010).

- 1 110. Betzel, R.F. *et al.* Changes in structural and functional connectivity among  
2 resting-state networks across the human lifespan. *Neuroimage* **102**, 345-357  
3 (2014).
- 4 111. Martin, A.R. *et al.* Clinical use of current polygenic risk scores may exacerbate  
5 health disparities. *Nature genetics* **51**, 584 (2019).
- 6 112. Dickie, E.W. *et al.* Ciftify: A framework for surface-based analysis of legacy MR  
7 acquisitions. *Neuroimage* **197**, 818-826 (2019).
- 8 113. Rolls, E.T., Huang, C.-C., Lin, C.-P., Feng, J. & Joliot, M. Automated anatomical  
9 labelling atlas 3. *NeuroImage* **206**, 116189 (2020).
- 10 114. Bijsterbosch, J. *et al.* Investigations into within-and between-subject resting-  
11 state amplitude variations. *Neuroimage* **159**, 57-69 (2017).
- 12 115. Bycroft, C. *et al.* The UK Biobank resource with deep phenotyping and genomic  
13 data. *Nature* **562**, 203-209 (2018).
- 14 116. Jiang, L. *et al.* A resource-efficient tool for mixed model association analysis of  
15 large-scale data. *Nature genetics* **51**, 1749 (2019).
- 16 117. Purcell, S. *et al.* PLINK: a tool set for whole-genome association and population-  
17 based linkage analyses. *The American Journal of Human Genetics* **81**, 559-575  
18 (2007).
- 19 118. Consortium, I.H. Integrating common and rare genetic variation in diverse  
20 human populations. *Nature* **467**, 52-58 (2010).

21

## 22 **METHODS**

23 **Imaging datasets.** We used resting and task fMRI data from the UKB and HCP studies. The  
24 UKB study had obtained ethics approval from the North West Multicentre Research Ethics  
25 Committee (approval number: 11/NW/0382). All experimental procedures in the HCP  
26 study were approved by the institutional review boards at Washington University  
27 (approval number: 201204036). The image acquisition and preprocessing procedures  
28 were detailed in the **Supplementary Note**. This study used a parcellation-based approach  
29 based on the Glasser360 atlas<sup>1</sup>. Briefly, for each subject, we projected the resting and task  
30 fMRI data onto the Glasser360 atlas and obtained the 360 × 360 functional connectivity  
31 matrices. The original Glasser360 atlas is a surface-based parcellation for the cerebral  
32 cortex<sup>112</sup> and it has been transformed to a volumetric atlas that is compatible with the

1 UKB volume-based data (**Supplementary Note**). The 360 functional areas were grouped  
2 into 12 functional networks<sup>45</sup> (**Table S1**). To aid interpretation, the 360 functional areas  
3 were labelled using the automated anatomical labeling atlas<sup>113</sup>. We mainly studied two  
4 sets of fMRI traits: area level traits and network level traits. Area level traits were the  
5 8,531 functional connectivity among all area pairs within each of the 12 networks, which  
6 provided fine details on cerebral cortex functional organizations and enabled the  
7 comparison between intrinsic and extrinsic functional architectures. Network level traits  
8 were expected to aggregate area level interactions within and between networks. To  
9 ensure high robustness and generalizability, we only input functional connectivity with  
10 high reproducibility and extracted these low-rank traits via a combined PCA and ICA  
11 dimension reduction approach in a training-validation design<sup>32</sup>. Additionally, we  
12 considered the mean amplitude of each network, which was a measure of brain  
13 activity<sup>114</sup>. Together, there were 1,985 network level traits, 1,066 of which were from  
14 resting fMRI and 919 from task fMRI. Detailed steps of our parcellation-based dimension  
15 reduction procedure can be found in the **Supplementary Note**. We removed values  
16 greater than five times the median absolute deviation from the median for each  
17 continuous phenotype or covariate variable. We analyzed the following datasets  
18 separately: 1) the white British discovery GWAS, which used data of individuals of white  
19 British ancestry<sup>115</sup> in UKB phases 1 to 3 data ( $n = 34,641$  for resting and 32,144 for task,  
20 released up through 2020); 2) European validation GWAS: UKB white but Non-British  
21 individuals in phases 1 to 3 data and all White individuals in newly released UKB phase 4  
22 data (UKBW,  $n = 4,882$  for resting and 4,023 for task); 3) two non-European UKB validation  
23 GWAS: UKB Asian (UKBA,  $n = 469$  for resting and 368 for task) and UKB Black (UKBBL,  $n =$   
24 261 for resting and 191 for task); and 4) the UKB first revisit data ( $n = 1,491$  for resting  
25 and 1,362 for task). The average age (at imaging) of all subjects was 64.16 (standard error  
26 = 7.73), 51.6% were females. The assignment of ancestry in UKB was based on self-  
27 reported ethnicity (Data-Field 21000), which was verified in Bycroft, et al. <sup>115</sup>.

28

29 **Heritability and GWAS analysis.** We downloaded the imputed data from UKB data  
30 resources. We performed the following quality controls on subjects with both imaging  
31 and genetics data: 1) excluded subjects with more than 10% missing genotypes; 2)  
32 excluded variants with minor allele frequency less than 0.01; 3) excluded variants with

1 missing genotype rate larger than 10%; 4) excluded variants that failed the Hardy-  
2 Weinberg test at  $1 \times 10^{-7}$  level; and 5) removed variants with imputation INFO score less  
3 than 0.8. SNP heritability was estimated by GCTA<sup>47</sup> using all autosomal SNPs in the white  
4 British discovery GWAS. We adjusted the effects of age (at imaging), age-squared, sex,  
5 age-sex interaction, age-squared-sex interaction, imaging site, the top 40 genetic  
6 principal components (PCs), as well as the head motion, head motion-squared, brain  
7 position, brain position-squared, and volumetric scaling. Genome-wide association  
8 analysis was performed in linear mixed effect model using fastGWA<sup>116</sup>, while adjusting  
9 the same set of covariates as in GCTA. GWAS were also separately performed via Plink<sup>117</sup>  
10 in validation datasets, where we adjusted for top ten genetic PCs instead of top 40. For  
11 area level traits. the independent lead variants were clumped by Plink (--clump-r2 0.1 --  
12 clump-kb 250). The genomic loci associated with network level traits were defined using  
13 FUMA<sup>95</sup> (version 1.3.5e). To define the LD boundaries, FUMA identified independent  
14 significant variants, which were defined as variants with a  $P$ -value smaller than the  
15 predefined threshold and were independent of other significant variants ( $LD\ r^2 < 0.6$ ).  
16 FUMA then constructed LD blocks for these independent significant variants by tagging  
17 all variants in LD ( $r^2 \geq 0.6$ ) with at least one independent significant variant and had a MAF  
18  $\geq 0.0005$ . These variants included those from the 1000 Genomes reference panel that  
19 may not have been included in the GWAS. Moreover, within these significant variants,  
20 independent lead variants were identified as those that were independent from each  
21 other ( $LD\ r^2 < 0.1$ ). If LD blocks of independent significant variants were close (<250 kb  
22 based on the closest boundary variants of LD blocks), they were merged into a single  
23 genomic locus. Thus, each genomic locus could contain multiple significant variants and  
24 lead variants. Independent significant variants and all the variants in LD with them ( $r^2 \geq$   
25  $0.6$ ) were searched on the NHGRI-EBI GWAS catalog (version 2019-09-24) to look for  
26 previously reported associations ( $P < 9 \times 10^{-6}$ ) with any traits. We performed association  
27 analysis to illustrate association patterns for selected colocalized index variants across all  
28 64,620 functional connectivity in resting and task fMRI. The significance threshold was set  
29 to be  $3.86 \times 10^{-7}$  ( $0.05/(64,620 \times 2)$ ). The same set of covariates used in the above GWAS  
30 analysis were adjusted in this analysis. LDSC<sup>55</sup> (version 1.0.1) was used to estimate and  
31 test genetic correlations. We used the pre-calculated LD scores provided by LDSC, which

1 were computed using 1000 Genomes European data. We used HapMap3<sup>118</sup> variants and  
2 removed all variants in the major histocompatibility complex (MHC) region.

3  
4 **Gene-level analysis, biological annotation, and prediction.** Gene-based association  
5 analysis was performed in UKB white British discovery GWAS for 18,796 protein-coding  
6 genes using MAGMA<sup>91</sup> (version 1.08). Default MAGMA settings were used with zero  
7 window size around each gene. We then carried out FUMA functional annotation and  
8 mapping analysis, in which variants were annotated with their biological functionality and  
9 then were linked to 35,808 candidate genes by a combination of positional, eQTL, and 3D  
10 chromatin interaction mappings. Brain-related tissues/cells were selected in all options  
11 and the default values were used for all other parameters in FUMA. For the detected  
12 genes in MAGMA and FUMA, we performed lookups in the NHGRI-EBI GWAS catalog  
13 (version 2020-02-08) to explore their previously reported gene-trait associations. We  
14 performed heritability enrichment analysis via partitioned LDSC<sup>97</sup>. Baseline models were  
15 adjusted when estimating and testing the enrichment scores for our brain cell type  
16 specific annotations.

17  
18 We built prediction models for fluid intelligence using both genetic variants and multi-  
19 type MRI traits, including 1,066 resting fMRI traits (network level), 919 task fMRI traits,  
20 215 DTI parameters from dMRI<sup>46</sup>, and 101 regional brain volumes from sMRI<sup>65</sup>. After  
21 removing relatives, we randomly splitting the white British imaging subjects into three  
22 independent datasets: training ( $n = 18,889$ ), validation ( $n = 6,338$ ), and testing design ( $n$   
23  $= 6,359$ ). The effect sizes of imaging predictors were estimated from the training data ( $n$   
24  $= 18,889$ ) and the genetic variants were estimated from all UKB white British subjects  
25 except for the ones in validation and testing data ( $n = 131,166$ ). We removed the effects  
26 of age, age-squared, sex, age-sex interaction, age-squared-sex interaction, imaging sites,  
27 head motion, brain position, and volumetric scaling on both MRI traits and fluid  
28 intelligence. We additional accounted for the top 40 genetic PCs for genetic variants. The  
29 genetic effects were trained via fastGWA and were aggregated using polygenic risk scores  
30 via PRS-CS<sup>102</sup>. The MRI traits were modeled using ridge regression via glmnet<sup>103</sup> (R version  
31 3.6.0). All model parameters were tuned in the validation data, and we evaluated the

1 prediction performance on the testing data by calculation the correlation between the  
2 predicted values and the observed ones.

3

#### 4 **Code availability**

5 We made use of publicly available software and tools. The codes used in fMRI  
6 preprocessing and the parcellation-based network level feature extraction pipeline will  
7 be shared on Zenodo.

8

#### 9 **Data availability**

10 Our GWAS summary statistics will be shared on Zenodo and at BIG-KP <https://bigkp.org/>.  
11 The individual-level data used in the present study can be applied from the UK Biobank  
12 (<https://www.ukbiobank.ac.uk/>) and HCP (<https://www.humanconnectome.org/>).

13

#### 14 **Fig. 1 Illustration of fMRI traits and their reproducibility.**

15 **(A)** Functional areas defined in the Glasser360 atlas (left hemisphere). See Table S1 for  
16 information of these areas and Figure S1 for maps of the whole brain (both hemispheres).  
17 Visual1, the primary visual network; Visual2, the secondary visual network. **(B)**  
18 Annotation of the 12 functional networks in the human brain. The default mode network  
19 (bottom right) is divided into seven clusters, mainly based on their physical locations. See  
20 Figure S11 for more information of the seven clusters. **(C)** Reproducibility of area level  
21 functional connectivity across the 12 networks in resting (left panel) and task (right panel)  
22 fMRI. **(D)** Comparison of reproducibility between the activated areas (within activation)  
23 and the nonactivated areas (out of activation) in task fMRI. The activation map can be  
24 found in Figure S8.

25

#### 26 **Fig. 2 SNP heritability in resting and task fMRI.**

27 **(A)** SNP heritability of fMRI traits, including 8,531 area level and 1,066 network level traits  
28 from resting fMRI (left panel), and 8,531 area level traits and 919 network level traits from  
29 task fMRI (right panel). **(B)** Significant SNP heritability of the functional connectivity within  
30 the default mode network in resting fMRI. We grouped all functional areas in the default  
31 mode network into seven clusters. These areas were mainly organized by their physical



1 locations (Fig. S11). OFC, orbitofrontal complex. **(C)** Comparison of SNP heritability  
2 between the activated areas (within activation, defined in task fMRI) and the  
3 nonactivated areas (out of activation) in resting fMRI (upper panel) and task fMRI (lower  
4 panel).

5

6 **Fig. 3 The associated genomic regions of fMRI traits.**

7 **(A)** Ideogram of 47 genomic regions influencing fMRI traits, including 32 regions identified  
8 by area level traits ( $P < 2.93 \times 10^{-12}$ ) and 15 more identified by network level traits ( $P <$   
9  $2.51 \times 10^{-11}$ ). The point colors represent the 12 networks (and their interactions, named  
10 Between networks). Each signal point indicates that at least one of the fMRI traits (area  
11 level or network level) of this network is associated with the genomic region. The name  
12 of regions replicated at the Bonferroni significance level and nominal significance level  
13 were highlighted in red and brown labels, respectively. **(B)** Functional areas in the cingulo-  
14 opercular and default mode networks associated with the 3p11.1 region ( $P < 2.93 \times 10^{-$   
15  $12$ ). These associations were enriched in the right PSL (Perisylvian language area, in the  
16 superior temporal) and the left PF (in the supramarginal) areas of the cingulo-opercular  
17 network and the left PGs (in the angular) and the left 31a areas (in the middle cingulate)  
18 of the default mode network. **(C)** Functional areas associated with the 19q13.32 region ( $P$   
19  $< 2.93 \times 10^{-12}$ ). Most of these areas were in the secondary visual network.

20

21 **Fig. 4 Selected genetic loci associated with both fMRI traits and brain disorders.**

22 **(A)** In the 19q13.32, we observed colocalization ( $LD r^2 \geq 0.6$ ) between Alzheimer's disease  
23 (index variant rs429358) and the functional connectivity within the secondary visual  
24 network (visual 2 <-> visual 2, index variant rs429358) in task fMRI. **(B)** We illustrated the  
25  $P$ -value of the association between the rs429358 and different neuroimaging traits,  
26 including functional connectivity in resting fMRI, functional connectivity in task fMRI,  
27 diffusion tensor imaging (DTI) from dMRI, and regional brain volumes from sMRI. The  
28 strongest genetic effects were in the secondary visual network of resting and task fMRI.  
29 **(C)** In 6q16.1, we observed colocalization between migraine (index variant rs11759769)  
30 and the functional connectivity of the default mode network (Default <-> Default, index

1 variant rs11152952) in resting fMRI. **(D)** In 2q14.1, insomnia (index variant rs62158170)  
2 was colocalized with the functional connectivity between the auditory and posterior  
3 multimodal networks (Auditory <-> Posterior-Multimodal, index variant rs56093896) in  
4 resting fMRI. **(E)** We illustrated the *P*-value of the rs62158170 on functional connectivity  
5 in resting fMRI. We displayed the functional connectivity passing the Bonferroni  
6 significance level ( $P < 3.86 \times 10^{-7}$ ) in this variant-specific analysis.

7

8 **Fig. 5 Selected pairwise genetic correlations between fMRI traits and cognitive function**  
9 **and schizophrenia.**

10 **(A)** We illustrated significant genetic correlations with cognitive function across different  
11 networks in resting fMRI at the FDR 5% level. These significant genetic correlations were  
12 particularly related to the functional connectivity of a few areas, such as the right IFSa in  
13 the cingulo–opercular network. **(B)** We illustrated significant genetic correlations with  
14 schizophrenia across different networks in resting fMRI at the FDR 5% level. These  
15 significant genetic correlations were particularly related to the functional connectivity of  
16 a few areas, such as the left 47s in the default mode network and the right LIPv in the  
17 secondary visual network. **(C)** We illustrated significant genetic correlations with cognitive  
18 function across different networks in task fMRI at the FDR 5% level. These significant  
19 genetic correlations were particularly related to the functional connectivity of a few  
20 areas, such as the left POS1 in the default mode network and the right V6 in the secondary  
21 visual network. Similar to the resting fMRI results in (A), genetic correlations with the  
22 default mode and dorsal attention networks were negative in task fMRI. However, the  
23 genetic correlations with the cingulo–opercular network became positive, and the  
24 somatomotor and secondary visual networks also had positive genetic correlations in task  
25 fMRI.

26

27 **Fig. 6 Partitioned heritability enrichment and integrative prediction analyses.**

28 **(A)** Heritability enrichment of global functional connectivity and global amplitude of  
29 resting fMRI in regulatory elements of glial cells (glia, including all glial cells,  
30 oligodendrocyte subtype, and microglia/astrocyte subtype) and neuronal cells (neurons,

1 including all neurons, GABAergic subtype, and glutamatergic subtype). The dashed lines  
2 indicate the nominal significance level. **(B)** Heritability enrichment of mean amplitude of  
3 the 12 networks in regulatory elements of glial and neuronal cell types. **(C)** Prediction  
4 accuracy of genetic variants and neuroimaging traits in fluid intelligence prediction  
5 analysis. Genetic PRS, polygenic risk scores of genetic variants; brain volume (sMRI),  
6 region brain volumes from sMRI; DTI parameters (dMRI), diffusion tensor imaging  
7 parameters from dMRI; All MRI traits, including brain volume, DTI parameters, resting  
8 fMRI, and task fMRI.

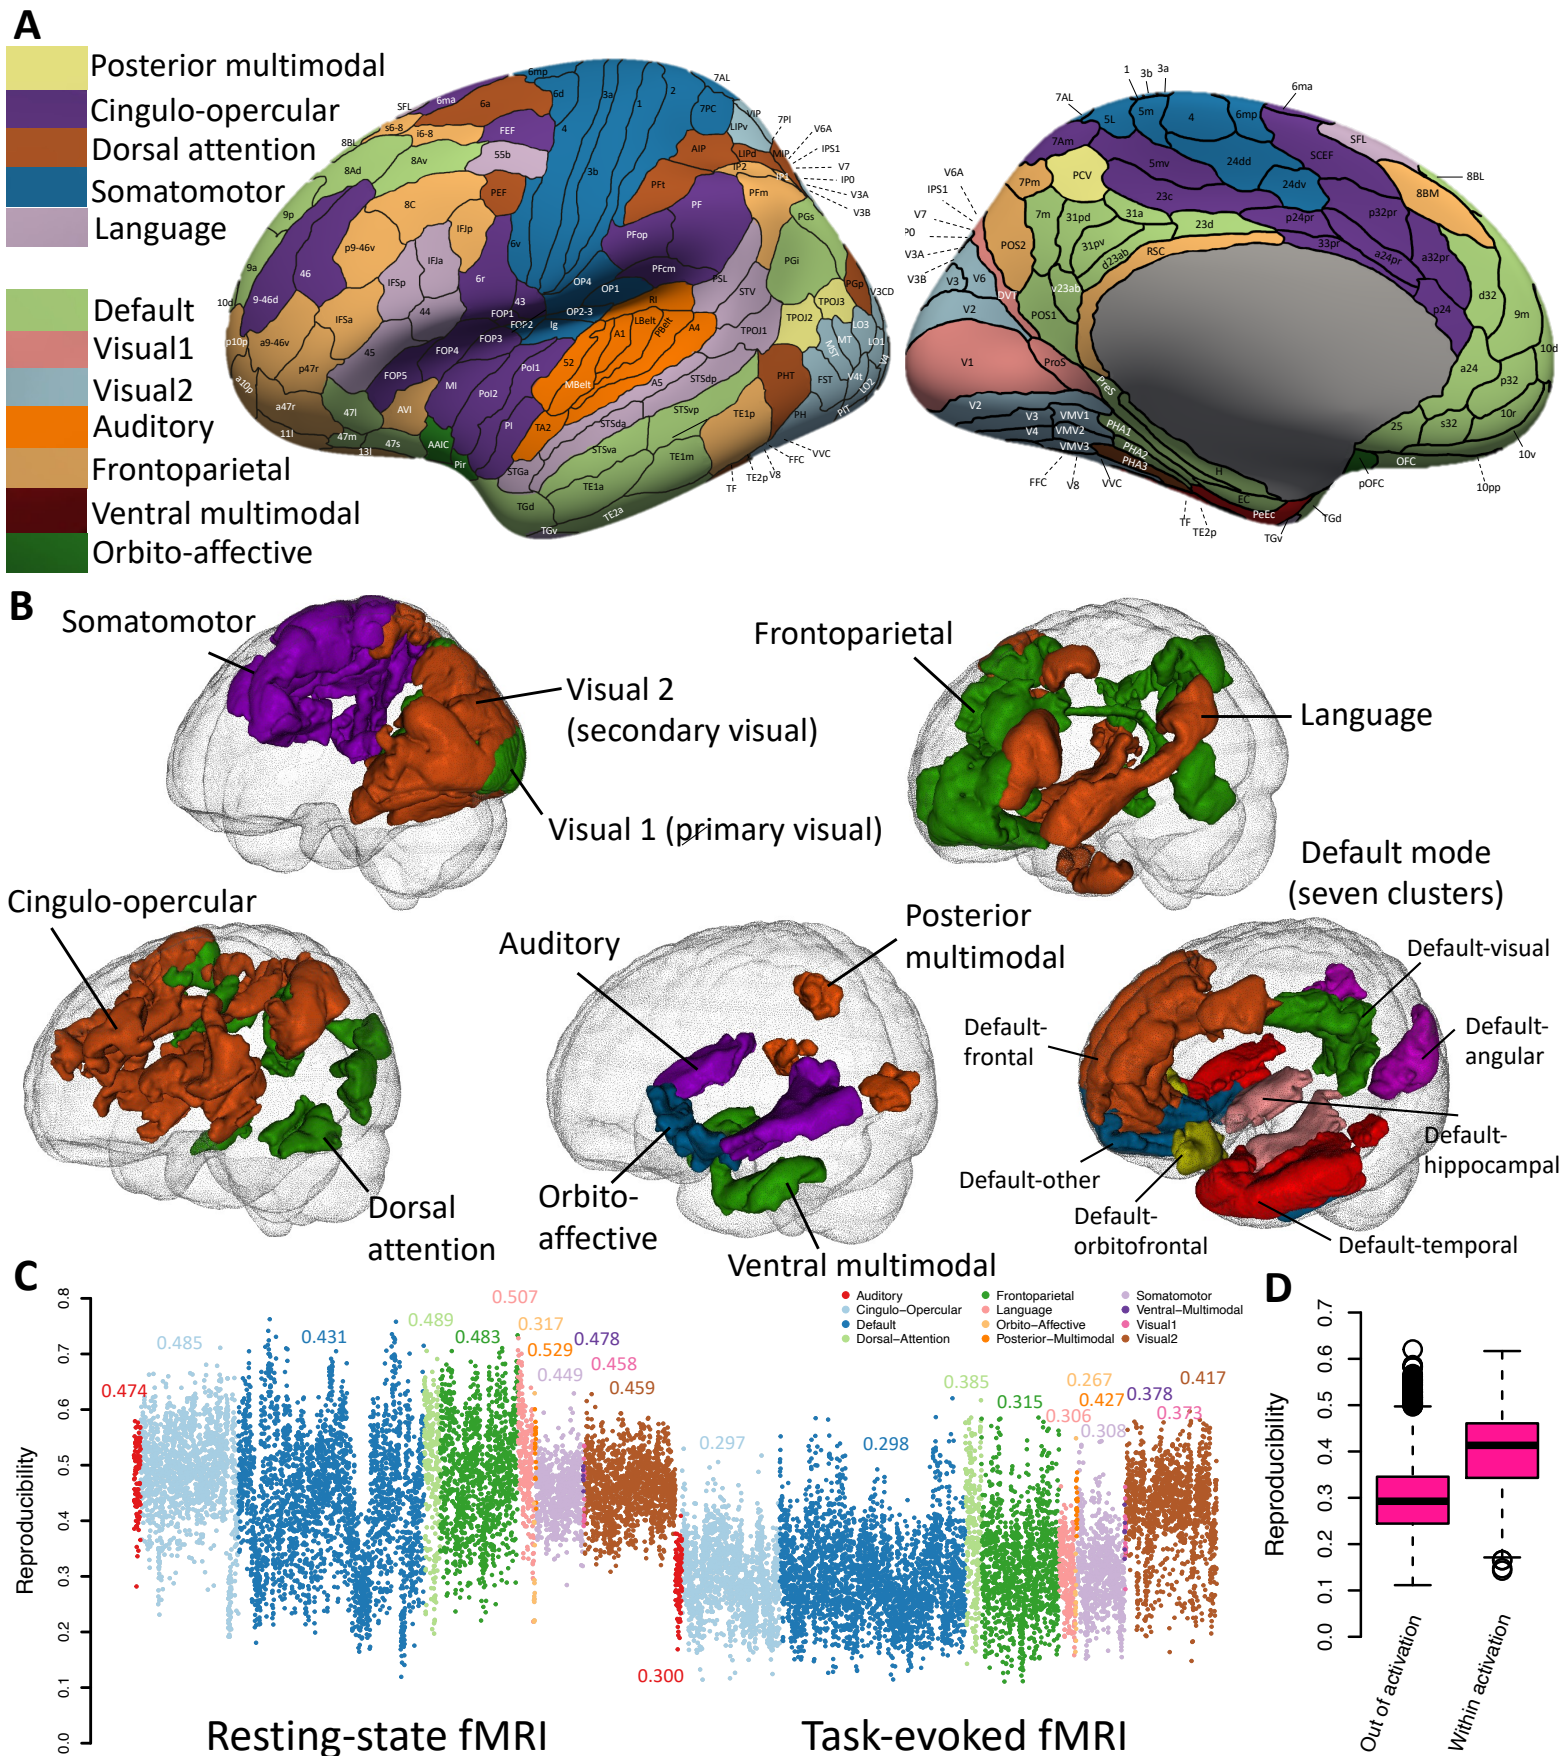

Figure 1

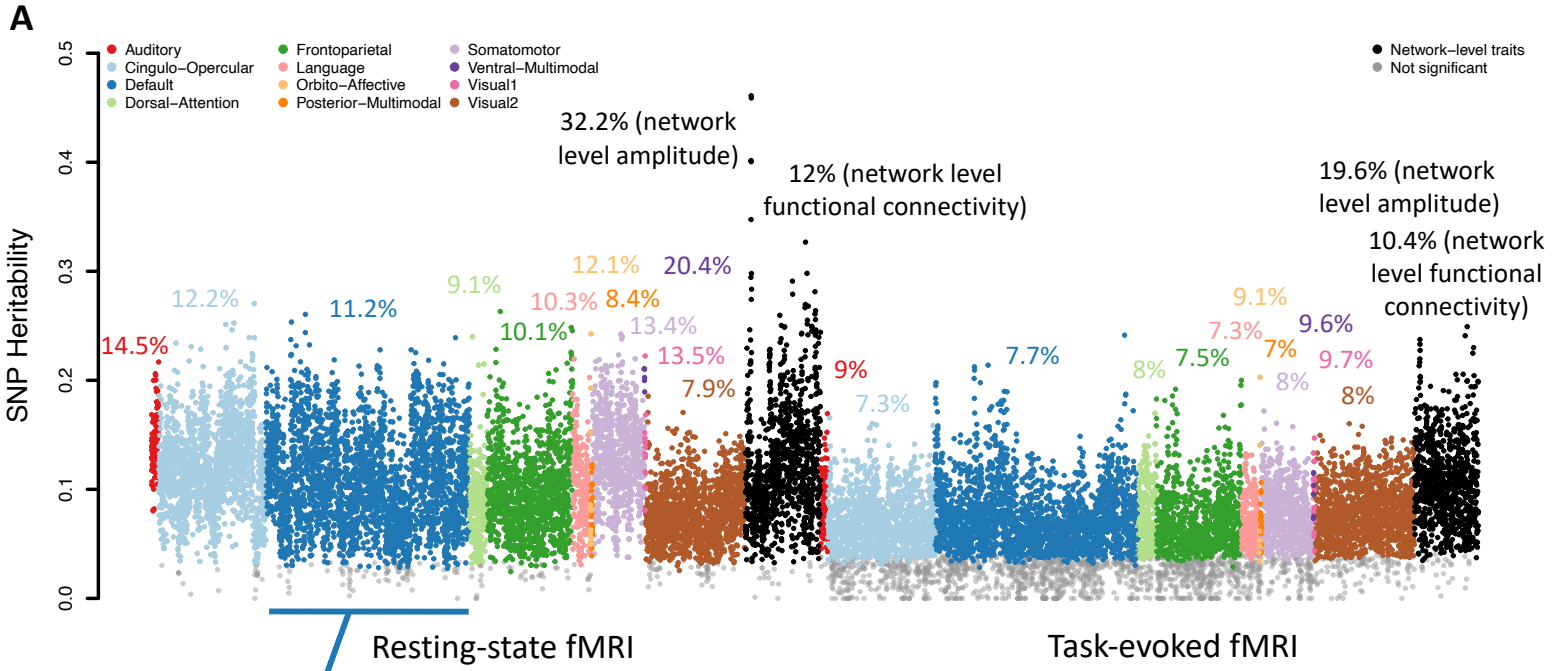

**B**

Heritability in default mode network (resting fMRI)

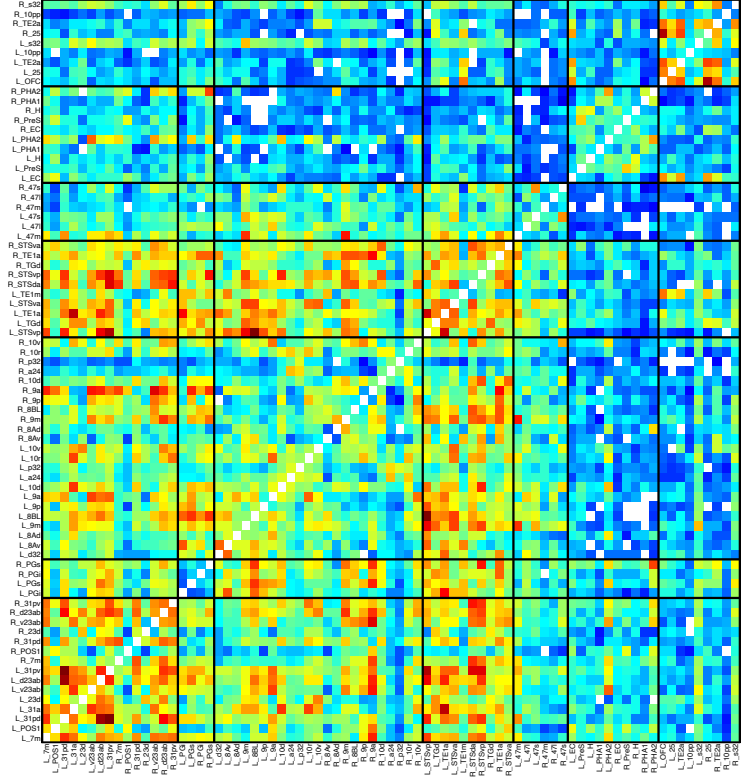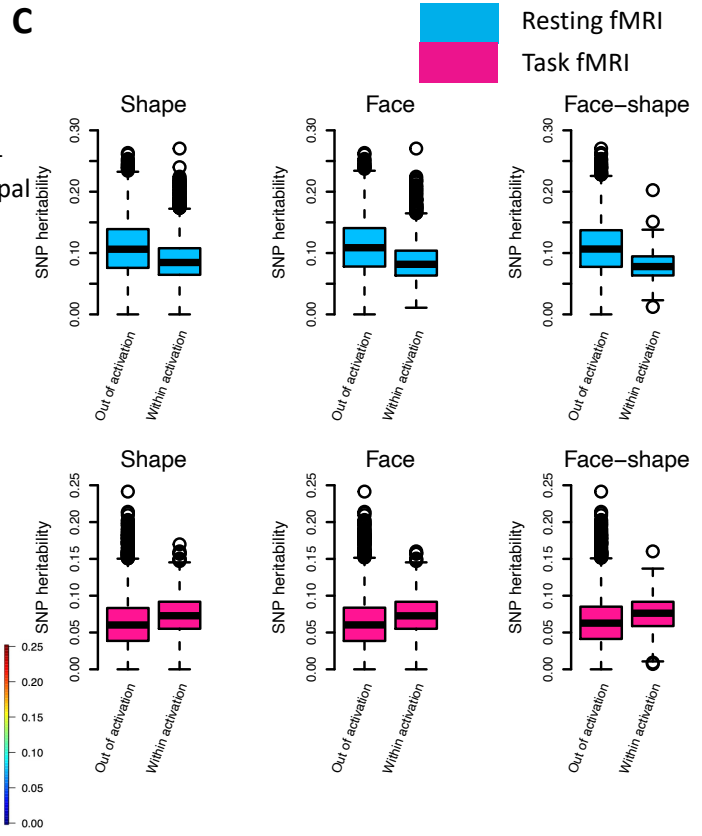

Figure 2



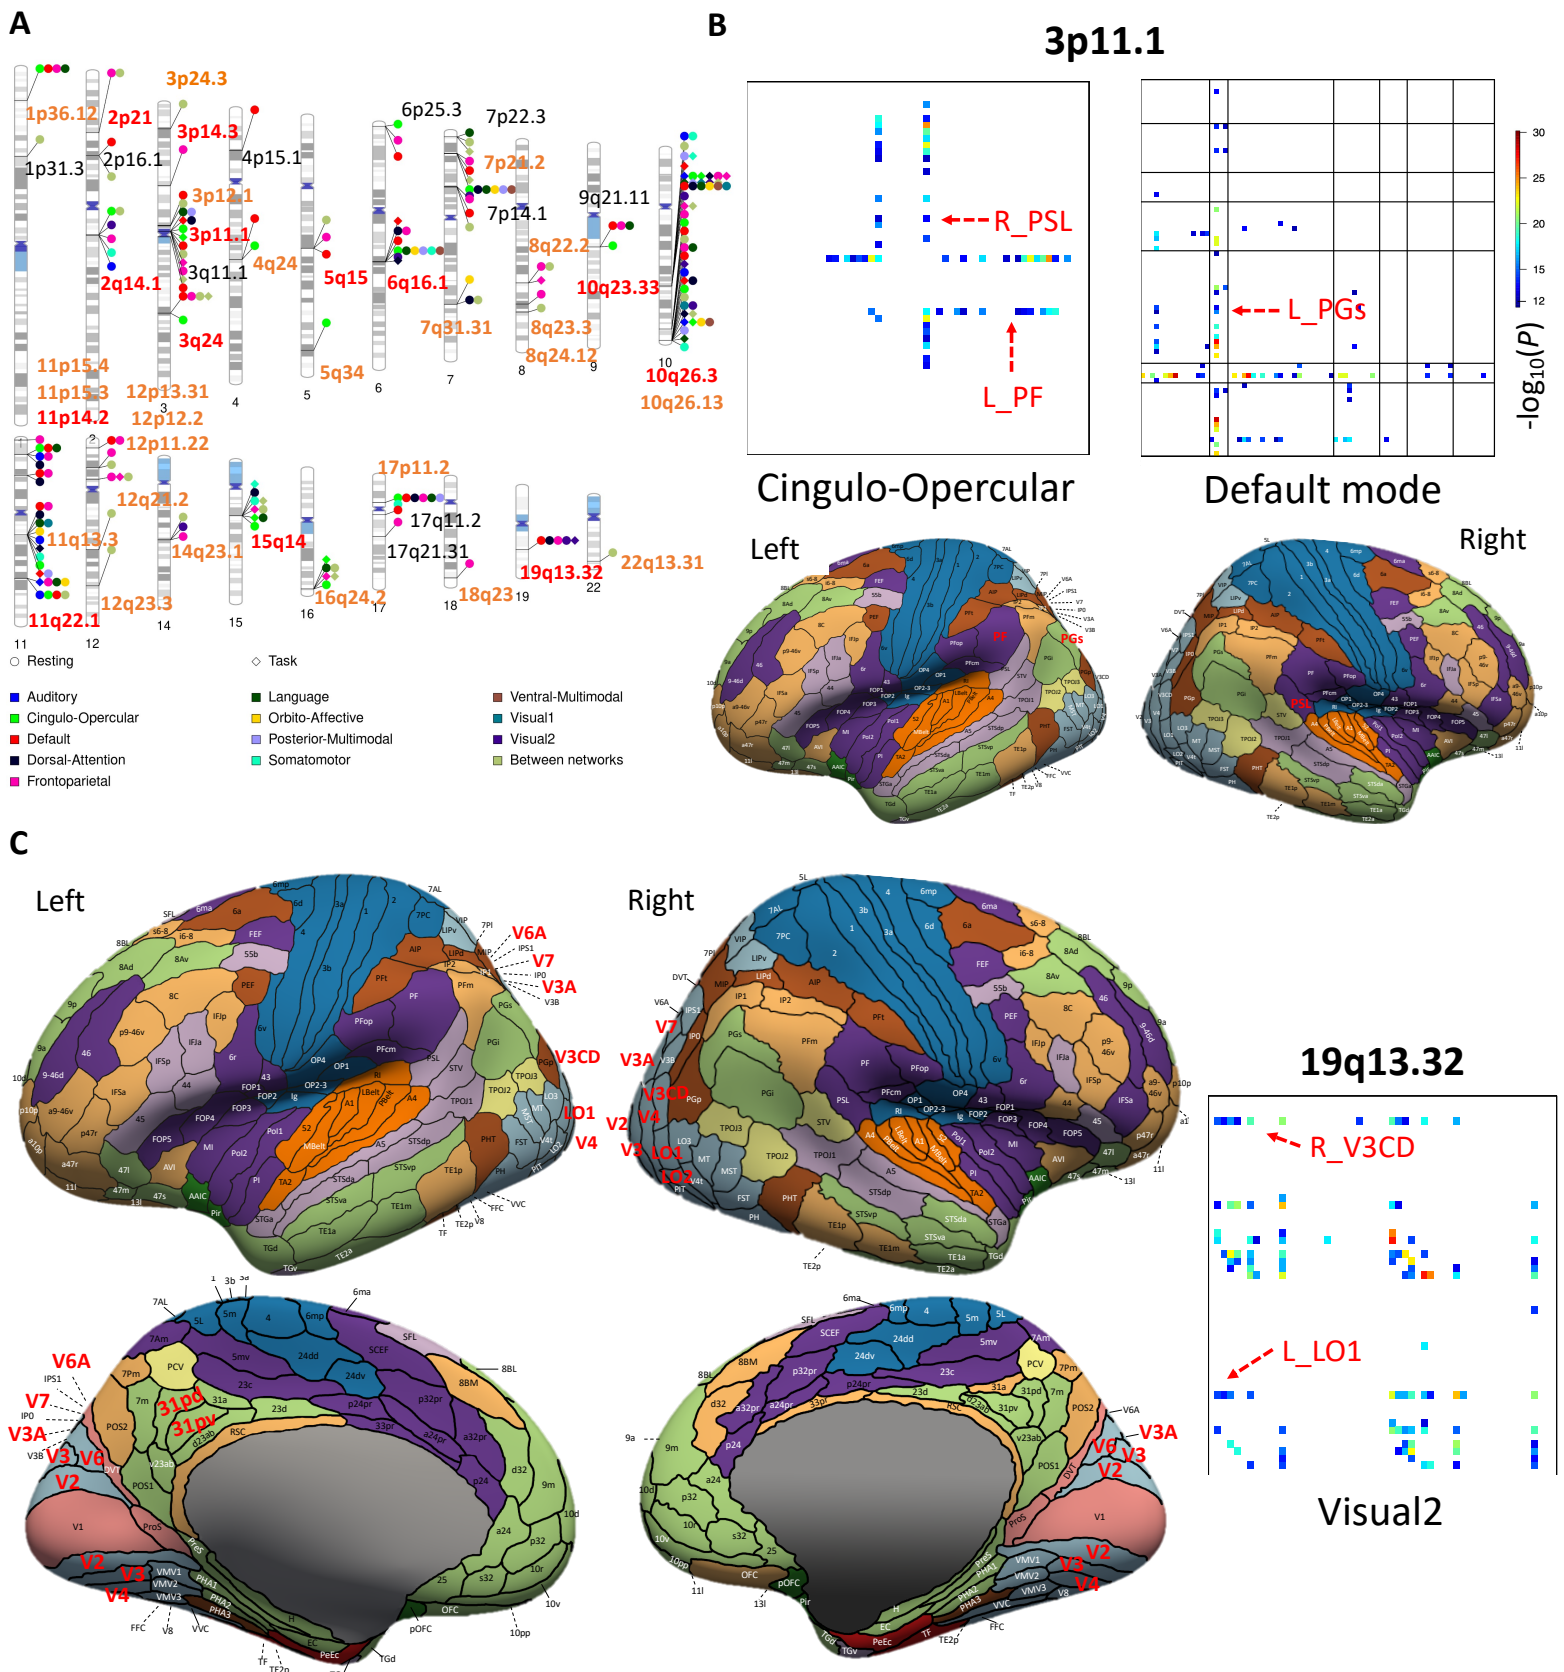

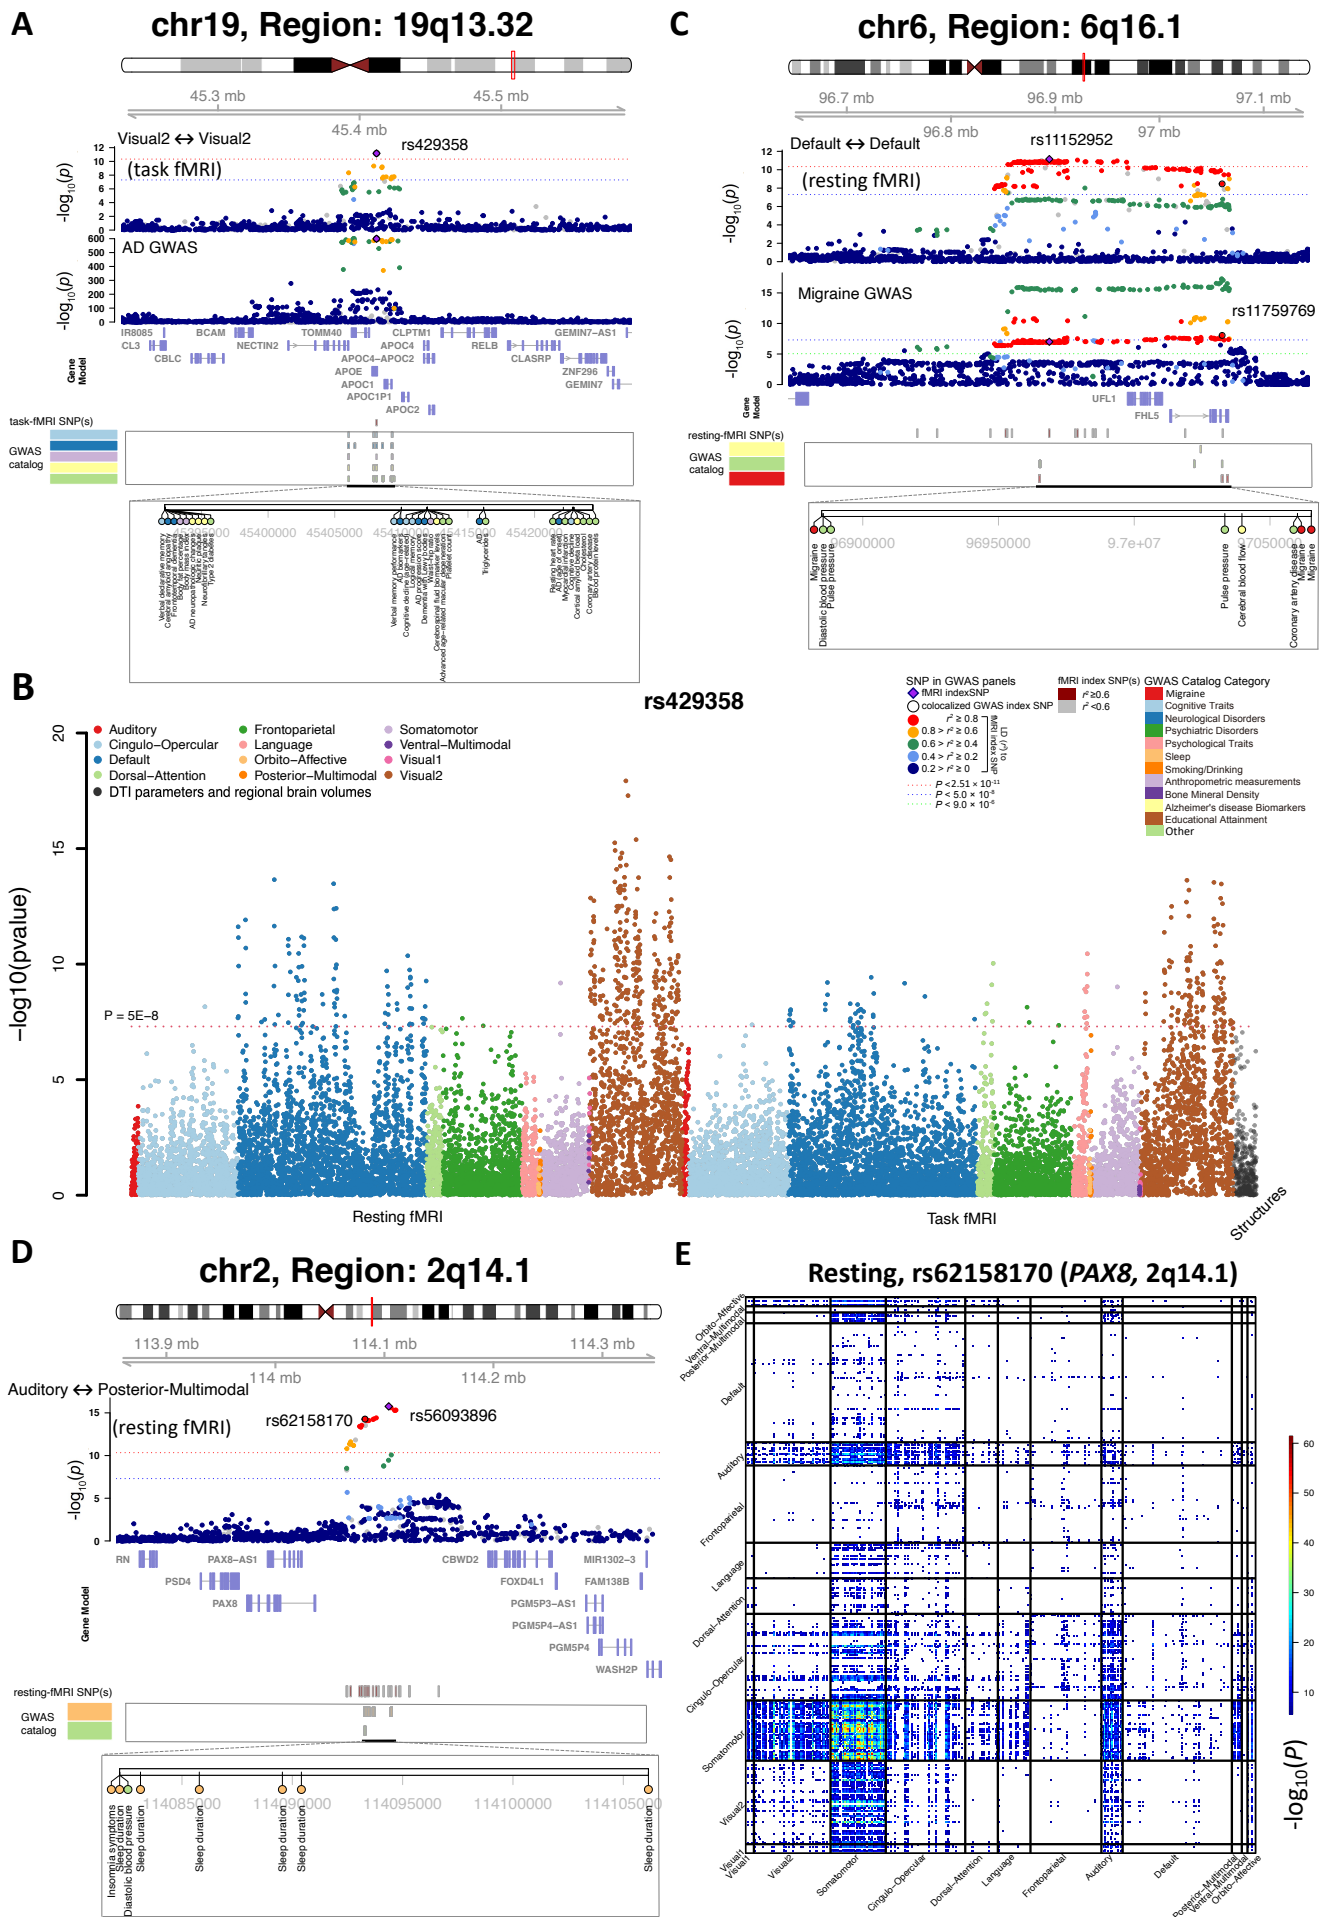

Figure 4

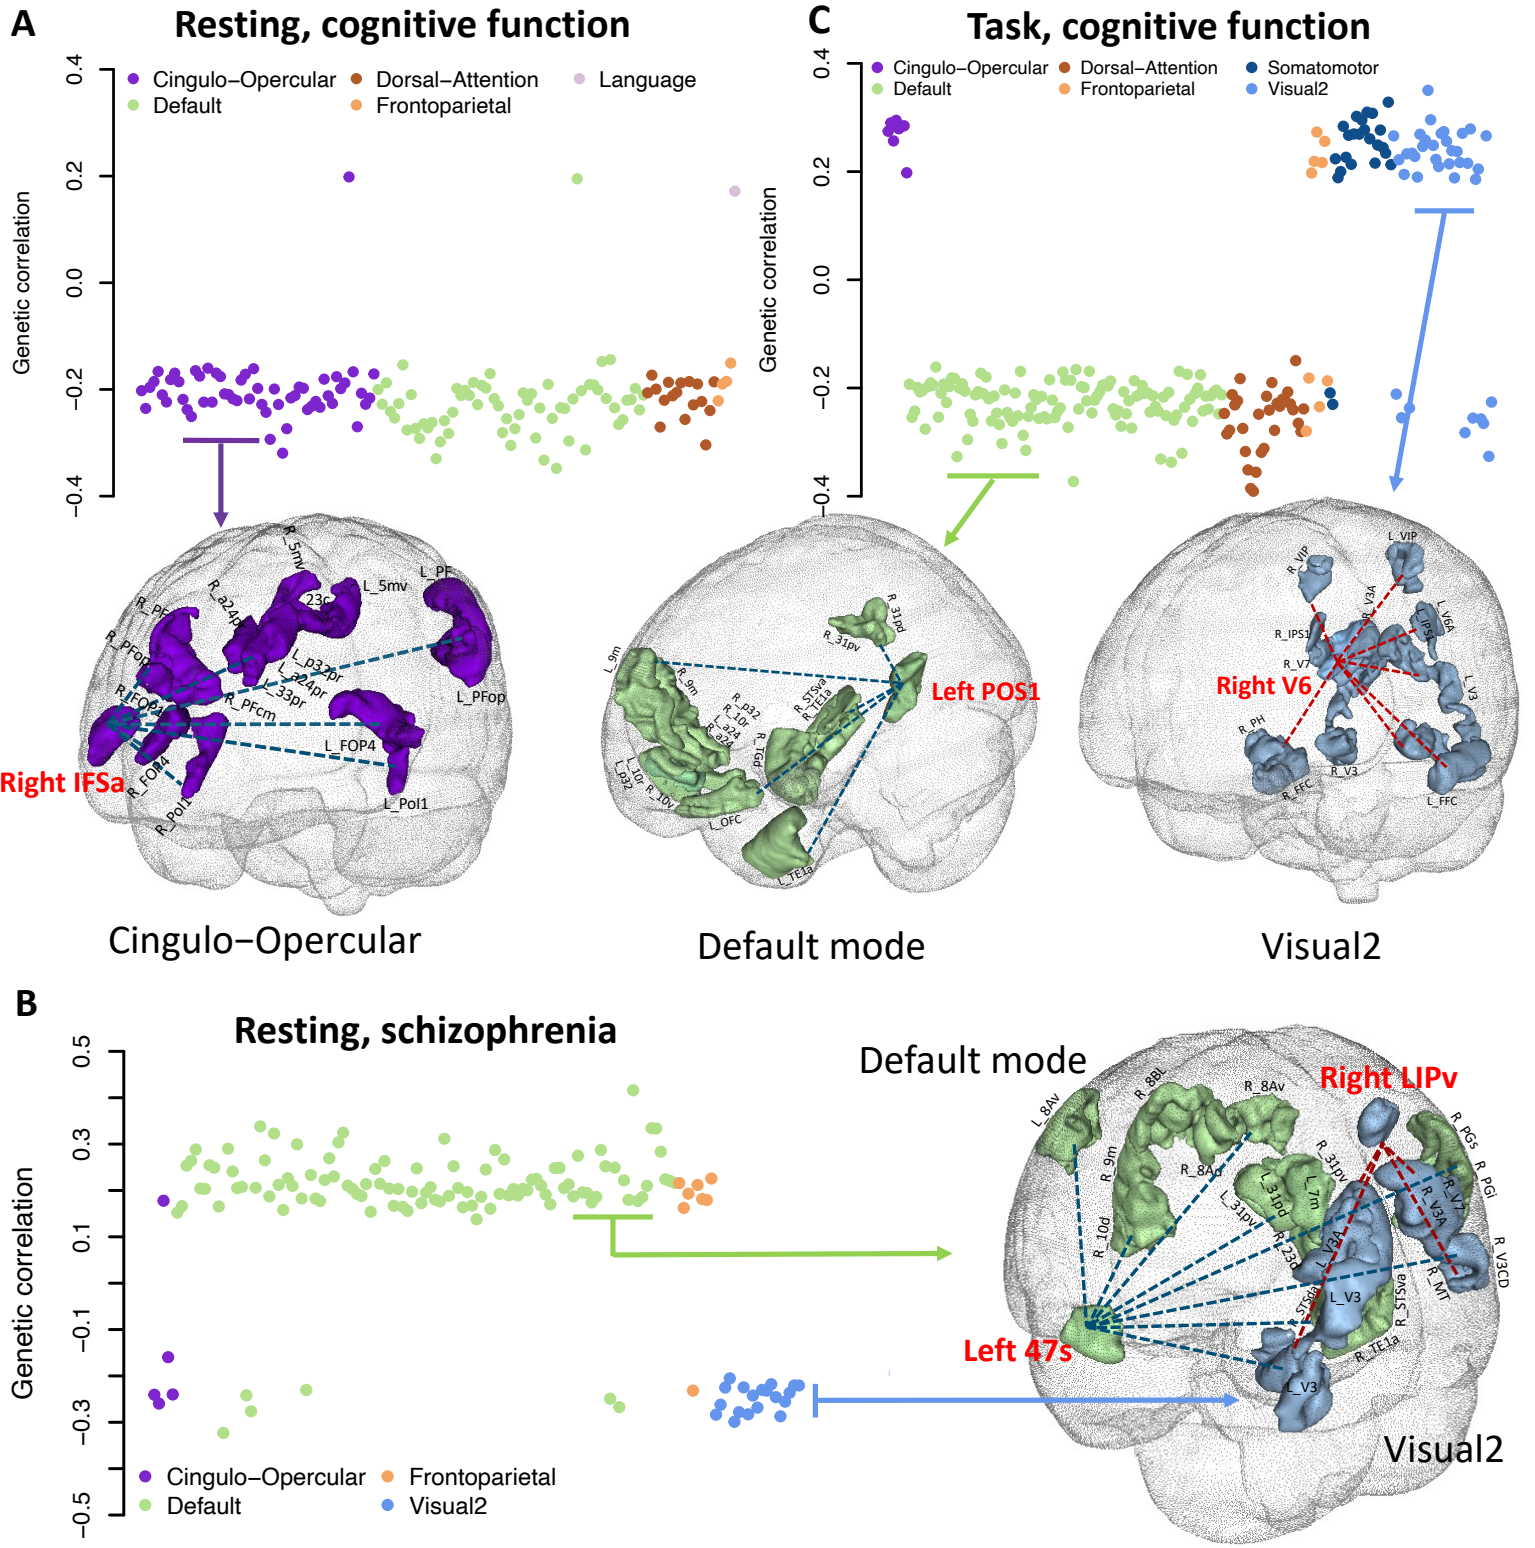

Figure 5



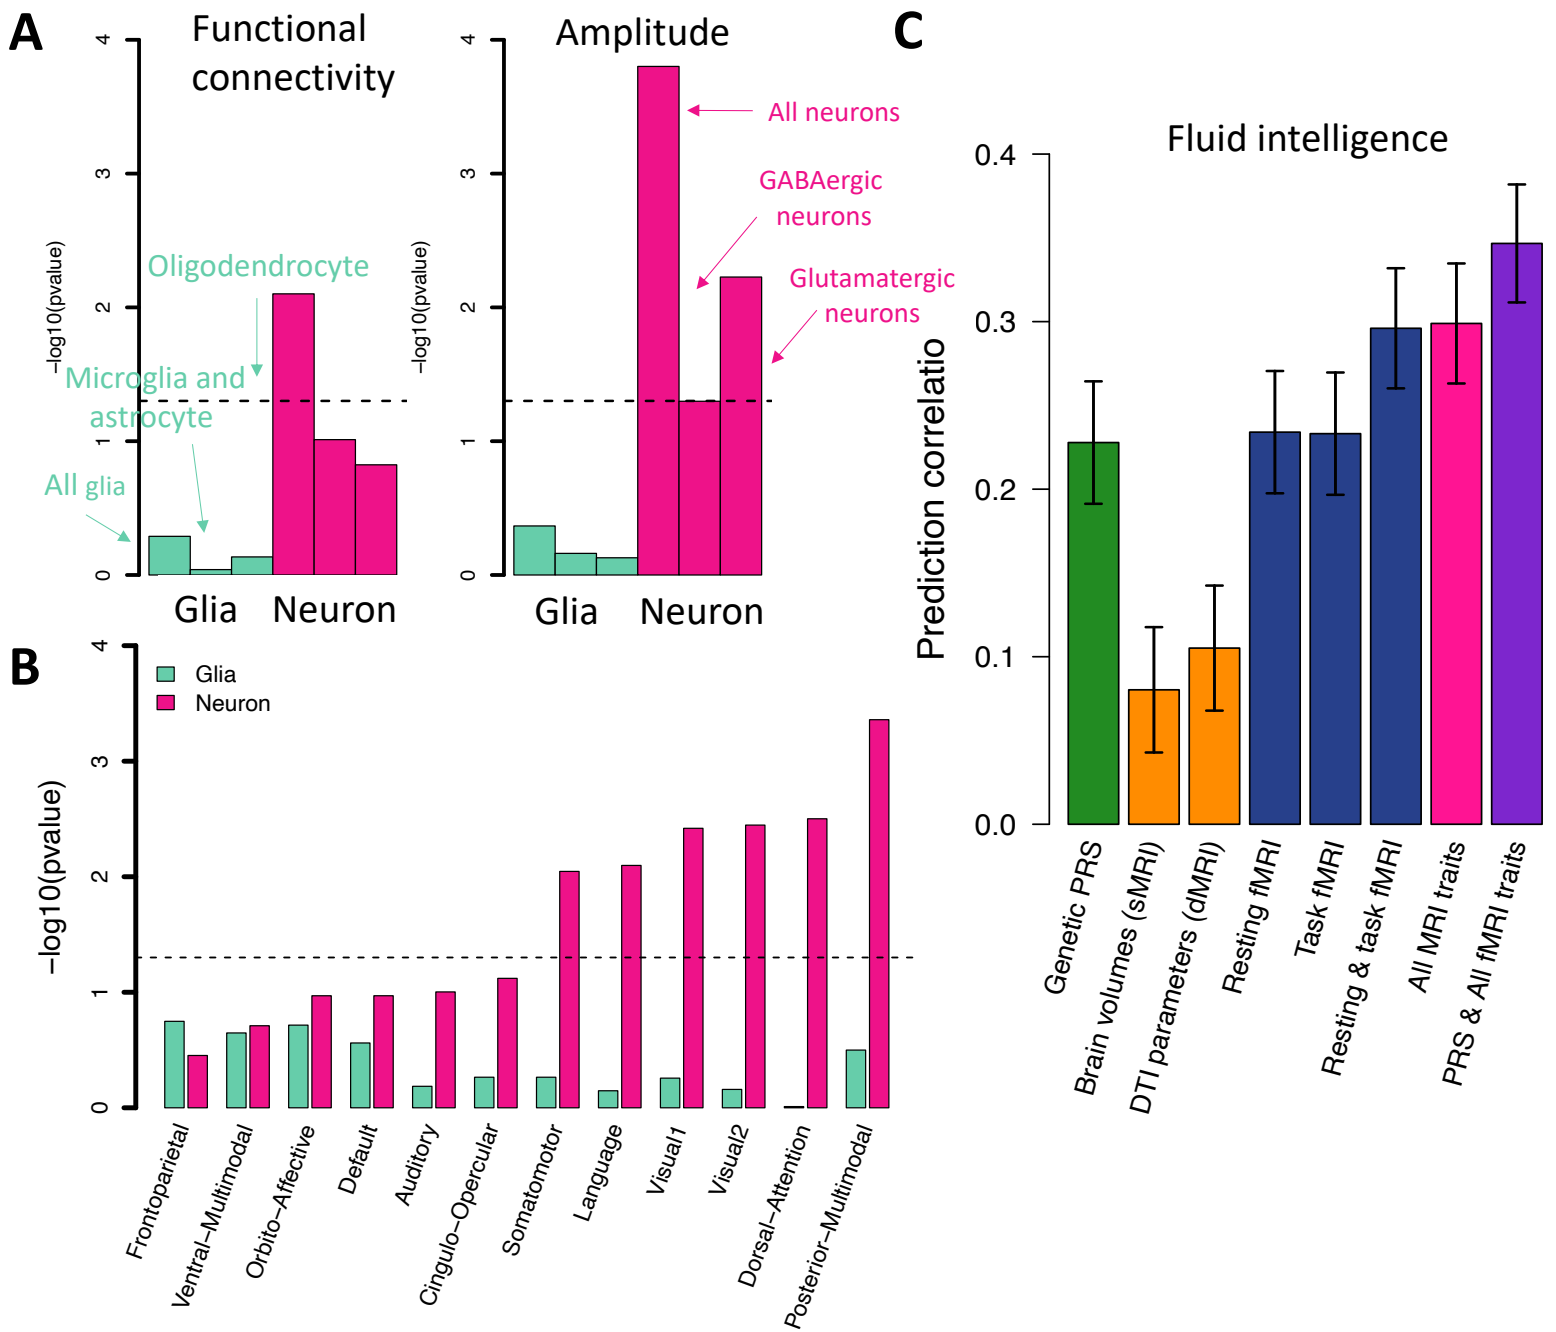

Figure 6
